# Supplementary material for: Clinician-friendly lower extremity physical performance measures in athletes: a systematic review of measurement properties and correlation with injury, part 1. The tests for knee function including the hop tests
Source: HighWire-hosted journal article supplement (doi:10.1136/bjsports-2014-094094), 2014-12-10
Supplement: bjsports-2014-094094supp_appendixB.pdf [file bjsports-2014-094094supp_appendixB.pdf]

**APPENDIX B**  
**Knee Methodological Quality**

Red type = Author's comments and methodological quality ratings  
Strikethrough indicates that the grading criteria are not applicable

|                                |
|--------------------------------|
| Battaglia/Am J Sports Med/2007 |
|--------------------------------|

STEP1: Evaluated measurement properties in the article

| Check if present | Property                                | Location |
|------------------|-----------------------------------------|----------|
|                  | Reliability                             | Box A    |
|                  | Agreement/Measurement Error             | Box B    |
| ✓                | Hypothesis Testing / Construct validity | Box C    |
|                  | Criterion/Predictive Validity           | Box D    |
|                  | Responsiveness                          | Box E    |

**Step 2. Determining if a study meets the standards for good methodological quality**

**C. Hypothesis Testing/Construct Validity N=102**

| Design requirements                                                                                           | Excellent                                                    | Good                                                                      | Fair                                                                        | Poor                                     |
|---------------------------------------------------------------------------------------------------------------|--------------------------------------------------------------|---------------------------------------------------------------------------|-----------------------------------------------------------------------------|------------------------------------------|
| Was the percentage of missing items given?<br><b>none</b>                                                     | Percentage of missing items described                        | <b>Percentage of missing items NOT described</b>                          | NA                                                                          | NA                                       |
| Was there a description of how missing items were handled? <b>none</b>                                        | Described how missing items were handled                     | <b>Not described but it can be deduced how missing items were handled</b> | Not clear how missing items were handled                                    |                                          |
| Was the sample size included in the analysis adequate?                                                        | Adequate sample size ( $\geq 100$ per analysis)              | <b>Good sample size (50-99 per analysis)</b>                              | Moderate sample size (30-49 per analysis)                                   | Small sample size ( $< 30$ per analysis) |
| Were hypotheses regarding correlations or mean differences formulated a priori (i.e. before data collection)? | hypotheses formulated a priori                               | Minimal number of hypotheses formulate a priori                           | Hypotheses vague or not formulated but possible to deduce what was expected | <b>Unclear what was expected</b>         |
| Was the expected <i>direction</i> of correlations or mean differences included in the hypotheses?             | Expected direction of the correlations or differences stated | <b>Expected direction of the correlations or differences NOT stated -</b> |                                                                             |                                          |
| Was the expected                                                                                              | Expected                                                     | <b>Expected</b>                                                           |                                                                             |                                          |

|                                                                                                                |                                                                                                                 |                                                                                                                                               |                                                                                                                                                                        |                                                                                     |
|----------------------------------------------------------------------------------------------------------------|-----------------------------------------------------------------------------------------------------------------|-----------------------------------------------------------------------------------------------------------------------------------------------|------------------------------------------------------------------------------------------------------------------------------------------------------------------------|-------------------------------------------------------------------------------------|
| absolute or relative <i>magnitude</i> of correlations or mean differences included in the hypotheses?          | magnitude of the correlations or differences stated                                                             | <b>magnitude of the correlations or differences NOT stated</b>                                                                                |                                                                                                                                                                        |                                                                                     |
| for convergent validity: Was an adequate description provided of the comparator instrument(s)?                 | <b>Adequate description of the constructs measured by the comparator instrument(s)</b>                          | Adequate description of most of the constructs measured by the comparator instrument(s)                                                       | Poor description of the constructs measured by the comparator instrument(s)                                                                                            | NO description of the constructs measured by the comparator instrument(s)           |
| for convergent validity: Were the measurement properties of the comparator instrument(s) adequately described? | Adequate measurement properties of the comparator instrument(s) in a population similar to the study population | Adequate measurement properties of the comparator instrument(s) but not sure if these apply to the study population                           | Some information on measurement properties (or a reference to a study on measurement properties) of the comparator instrument(s) in any study population               | <b>No information on the measurement properties of the comparator instrument(s)</b> |
| Were there any important flaws in the design or methods of the study?                                          | <b>No other important methodological flaws in the design or execution of the study</b>                          |                                                                                                                                               | Other minor methodological flaws in the design or execution of the study (e.g. only data presented on a comparison with an instrument that measures another construct) | Other important methodological flaws in the design or execution of the study        |
| Were design and statistical methods adequate for the hypotheses to be tested?                                  | <b>Statistical methods applied appropriate</b>                                                                  | Assumable that statistical methods were appropriate, e.g. Pearson correlations applied, but distribution of scores or mean (SD) not presented | Statistical methods applied NOT optimal                                                                                                                                | Statistical methods applied NOT appropriate                                         |

Bjorklund/Knee Surg Sports Traumatol/2006

**STEP1: Evaluated measurement properties in the article**

| Check if present | Property                       | Location |
|------------------|--------------------------------|----------|
| ✓                | Reliability                    | Box A    |
|                  | Agreement/Measurement Error    | Box B    |
| ✓                | Hypothesis Testing / Construct | Box C    |

|  |                               |       |
|--|-------------------------------|-------|
|  | validity                      |       |
|  | Criterion/Predictive Validity | Box D |

## Step 2. Determining if a study meets the standards for good methodological quality

### A. Reliability

| Design requirements                                                                                            | Excellent                                                                              | Good                                                                         | Fair                                                                     | Poor                                                                         |
|----------------------------------------------------------------------------------------------------------------|----------------------------------------------------------------------------------------|------------------------------------------------------------------------------|--------------------------------------------------------------------------|------------------------------------------------------------------------------|
| Was the percentage of missing subjects given?<br><b>none</b>                                                   | Percentage of missing subjects described                                               | <b>Percentage of missing subjects NOT described</b>                          |                                                                          |                                                                              |
| Was there a description of how missing subjects were handled? <b>none</b>                                      | Described how missing subjects were handled                                            | <b>Not described but it can be deduced how missing subjects were handled</b> | Not clear how missing subjects were handled                              |                                                                              |
| Was the sample size included in the analysis adequate?                                                         | Adequate sample size ( $\geq 100$ )                                                    | <b>Good sample size (50-99)</b>                                              | Moderate sample size (30-49)                                             | Small sample size (<30)                                                      |
| Were at least two measurements available?<br>Intra and inter <b>intra only</b>                                 | <b>At least two measurements</b>                                                       |                                                                              |                                                                          | Only one measurement                                                         |
| Were the administrations independent? Intra                                                                    | <b>Independent measurements</b>                                                        | Assumable that the measurements were independent                             | Doubtful whether the measurements were independent                       | Measurements NOT independent                                                 |
| Was the time interval stated?<br>Intra                                                                         | <b>Time interval stated</b>                                                            |                                                                              | Time interval NOT stated                                                 |                                                                              |
| Were patients stable in the interim period on the construct to be measured?<br>Intra                           | Patients were stable (evidence provided)                                               | <b>Assumable that patients were stable</b>                                   | Unclear if patients were stable                                          | Patients were NOT stable                                                     |
| Was the time interval appropriate?<br>Intra                                                                    | <b>Time interval appropriate</b>                                                       |                                                                              | Doubtful whether time interval was appropriate                           | Time interval NOT appropriate                                                |
| Were the test conditions similar for both measurements? e.g. type of administration, environment, instructions | Test conditions were similar (evidence provided)                                       | Assumable that test conditions were similar                                  | <b>Unclear if test conditions were similar</b>                           | Test conditions were NOT similar                                             |
| Were there any important flaws in the design or methods of the study?<br>Intra                                 | <b>No other important methodological flaws in the design or execution of the study</b> |                                                                              | Other minor methodological flaws in the design or execution of the study | Other important methodological flaws in the design or execution of the study |
| for continuous scores: Was an intraclass correlation coefficient (ICC) calculated?                             | ICC calculated and model or formula of the ICC is                                      | ICC calculated but model or formula of the ICC not                           | Pearson or Spearman correlation coefficient                              | No ICC or Pearson or Spearman correlations                                   |

|                                                                                |                            |                                                                                                                                                |                                                                                                                                  |                                      |
|--------------------------------------------------------------------------------|----------------------------|------------------------------------------------------------------------------------------------------------------------------------------------|----------------------------------------------------------------------------------------------------------------------------------|--------------------------------------|
|                                                                                | described                  | described or not optimal. Pearson or Spearman correlation coefficient calculated with evidence provided that no systematic change has occurred | calculated WITHOUT evidence provided that no systematic change has occurred or WITH evidence that systematic change has occurred | calculated                           |
| For dichotomous/nominal/ordinal scores: Was kappa calculated?                  | Kappa calculated           |                                                                                                                                                |                                                                                                                                  | Only percentage agreement calculated |
| discriminant for ordinal scores: Was a weighted kappa calculated?              | Weighted Kappa calculated  |                                                                                                                                                | Unweighted Kappa calculated                                                                                                      | Only percentage agreement calculated |
| for ordinal scores: Was the weighting scheme described? e.g. linear, quadratic | Weighting scheme described | Weighting scheme NOT described                                                                                                                 |                                                                                                                                  |                                      |

### C. Hypothesis Testing / Construct Validity

| Design requirements                                                                                           | Excellent                                       | Good                                                               | Fair                                                                        | Poor                                 |
|---------------------------------------------------------------------------------------------------------------|-------------------------------------------------|--------------------------------------------------------------------|-----------------------------------------------------------------------------|--------------------------------------|
| Was the percentage of missing items given?<br><b>none</b>                                                     | Percentage of missing items described           | Percentage of missing items NOT described                          | NA                                                                          | NA                                   |
| Was there a description of how missing items were handled? <b>none</b>                                        | Described how missing items were handled        | Not described but it can be deduced how missing items were handled | Not clear how missing items were handled                                    |                                      |
| Was the sample size included in the analysis adequate?                                                        | Adequate sample size ( $\geq 100$ per analysis) | Good sample size (50-99 per analysis)                              | Moderate sample size (30-49 per analysis)                                   | Small sample size (<30 per analysis) |
| Were hypotheses regarding correlations or mean differences formulated a priori (i.e. before data collection)? | hypotheses formulated a priori                  | Minimal number of hypotheses formulate a priori                    | Hypotheses vague or not formulated but possible to deduce what was expected | Unclear what was expected            |
| Was the expected <i>direction</i> of correlations or                                                          | Expected direction of the correlations or       | Expected direction of the correlations or                          |                                                                             |                                      |

|                                                                                                                        |                                                                                                                 |                                                                                                                                               |                                                                                                                                                                        |                                                                                                                       |
|------------------------------------------------------------------------------------------------------------------------|-----------------------------------------------------------------------------------------------------------------|-----------------------------------------------------------------------------------------------------------------------------------------------|------------------------------------------------------------------------------------------------------------------------------------------------------------------------|-----------------------------------------------------------------------------------------------------------------------|
| mean differences included in the hypotheses?                                                                           | differences stated                                                                                              | differences NOT stated -                                                                                                                      |                                                                                                                                                                        |                                                                                                                       |
| Was the expected absolute or relative <i>magnitude</i> of correlations or mean differences included in the hypotheses? | Expected magnitude of the correlations or differences stated                                                    | Expected magnitude of the correlations or differences NOT stated                                                                              |                                                                                                                                                                        |                                                                                                                       |
| for convergent validity: Was an adequate description provided of the comparator instrument(s)?                         | Adequate description of the constructs measured by the comparator instrument(s)                                 | Adequate description of most of the constructs measured by the comparator instrument(s)                                                       | Poor description of the constructs measured by the comparator instrument(s)                                                                                            | NO description of the constructs measured by the comparator instrument(s)                                             |
| for convergent validity: Were the measurement properties of the comparator instrument(s) adequately described?         | Adequate measurement properties of the comparator instrument(s) in a population similar to the study population | Adequate measurement properties of the comparator instrument(s) but not sure if these apply to the study population                           | Some information on measurement properties (or a reference to a study on measurement properties) of the comparator instrument(s) in any study population               | No information on the measurement properties of the comparator instrument(s)<br>NOTE: First time tested in this study |
| Were there any important flaws in the design or methods of the study?                                                  | No other important methodological flaws in the design or execution of the study                                 |                                                                                                                                               | Other minor methodological flaws in the design or execution of the study (e.g. only data presented on a comparison with an instrument that measures another construct) | Other important methodological flaws in the design or execution of the study                                          |
| Were design and statistical methods adequate for the hypotheses to be tested?                                          | Statistical methods applied appropriate                                                                         | Assumable that statistical methods were appropriate, e.g. Pearson correlations applied, but distribution of scores or mean (SD) not presented | Statistical methods applied NOT optimal                                                                                                                                | Statistical methods applied NOT appropriate                                                                           |

Bjorklund/Knee Surg Sports Traumatol/2009

**STEP1: Evaluated measurement properties in the article**

| Check if present | Property                                | Location |
|------------------|-----------------------------------------|----------|
|                  | Reliability                             | Box A    |
|                  | Agreement/Measurement Error             | Box B    |
| ✓                | Hypothesis Testing / Construct validity | Box C    |
|                  | Criterion/Predictive Validity           | Box D    |
| ✓                | Responsiveness                          | Box E    |
|                  | Predictive/Criterion validity           | Box F    |

## Step 2. Determining if a study meets the standards for good methodological quality

### C. Hypothesis Testing / Construct Validity

| Design requirements                                                                                                    | Excellent                                                           | Good                                                                      | Fair                                                                        | Poor                                     |
|------------------------------------------------------------------------------------------------------------------------|---------------------------------------------------------------------|---------------------------------------------------------------------------|-----------------------------------------------------------------------------|------------------------------------------|
| Was the percentage of missing items given?<br><b>none</b>                                                              | Percentage of missing items described                               | <b>Percentage of missing items NOT described</b>                          | NA                                                                          | NA                                       |
| Was there a description of how missing items were handled? <b>none</b>                                                 | Described how missing items were handled                            | <b>Not described but it can be deduced how missing items were handled</b> | Not clear how missing items were handled                                    |                                          |
| Was the sample size included in the analysis adequate?                                                                 | Adequate sample size ( $\geq 100$ per analysis)                     | Good sample size (50-99 per analysis)                                     | <b>Moderate sample size (30-49 per analysis)</b>                            | Small sample size ( $< 30$ per analysis) |
| Were hypotheses regarding correlations or mean differences formulated a priori (i.e. before data collection)?          | <b>hypotheses formulated a priori</b>                               | Minimal number of hypotheses formulate a priori                           | Hypotheses vague or not formulated but possible to deduce what was expected | Unclear what was expected                |
| Was the expected <i>direction</i> of correlations or mean differences included in the hypotheses?                      | <b>Expected direction of the correlations or differences</b> stated | Expected direction of the correlations or differences NOT stated -        |                                                                             |                                          |
| Was the expected absolute or relative <i>magnitude</i> of correlations or mean differences included in the hypotheses? | Expected magnitude of the correlations or differences stated        | <b>Expected magnitude of the correlations or differences NOT stated</b>   |                                                                             |                                          |
| for convergent validity: Was an                                                                                        | <b>Adequate description of the</b>                                  | Adequate description of                                                   | Poor description of the constructs                                          | NO description of the constructs         |

|                                                                                                                |                                                                                                                                    |                                                                                                                                               |                                                                                                                                                                        |                                                                                                                          |
|----------------------------------------------------------------------------------------------------------------|------------------------------------------------------------------------------------------------------------------------------------|-----------------------------------------------------------------------------------------------------------------------------------------------|------------------------------------------------------------------------------------------------------------------------------------------------------------------------|--------------------------------------------------------------------------------------------------------------------------|
| adequate description provided of the comparator instrument(s)?                                                 | <b>constructs measured by the comparator instrument(s)</b>                                                                         | most of the constructs measured by the comparator instrument(s)                                                                               | measured by the comparator instrument(s)                                                                                                                               | measured by the comparator instrument(s)                                                                                 |
| for convergent validity: Were the measurement properties of the comparator instrument(s) adequately described? | <b>Adequate measurement properties of the comparator instrument(s) in a population similar to the study population IKDC, SF-36</b> | Adequate measurement properties of the comparator instrument(s) but not sure if these apply to the study population                           | Some information on measurement properties (or a reference to a study on measurement properties) of the comparator instrument(s) in any study population               | No information on the measurement properties of the comparator instrument(s)<br>NOTE:<br>First time tested in this study |
| Were there any important flaws in the design or methods of the study?                                          | <b>No other important methodological flaws in the design or execution of the study</b>                                             |                                                                                                                                               | Other minor methodological flaws in the design or execution of the study (e.g. only data presented on a comparison with an instrument that measures another construct) | Other important methodological flaws in the design or execution of the study                                             |
| Were design and statistical methods adequate for the hypotheses to be tested?                                  | <b>Statistical methods applied appropriate</b>                                                                                     | Assumable that statistical methods were appropriate, e.g. Pearson correlations applied, but distribution of scores or mean (SD) not presented | Statistical methods applied NOT optimal                                                                                                                                | Statistical methods applied NOT appropriate                                                                              |

### E. Responsiveness

| Design requirements                                        | Excellent                                | Good                                                                      | Fair                                     | Poor                        |
|------------------------------------------------------------|------------------------------------------|---------------------------------------------------------------------------|------------------------------------------|-----------------------------|
| Was the percentage of missing items given?                 | Percentage of missing items described    | <b>Percentage of missing items NOT described</b>                          |                                          |                             |
| Was there a description of how missing items were handled? | Described how missing items were handled | <b>Not described but it can be deduced how missing items were handled</b> | Not clear how missing items were handled |                             |
| Was the sample size included in the analysis adequate?     | Adequate sample size ( $\geq 100$ )      | <b>Good sample size (50-99)</b>                                           | Moderate sample size (30-49)             | Small sample size (<30)     |
| Was a longitudinal design with at                          | <b>Longitudinal design used</b>          |                                                                           |                                          | No longitudinal design used |

|                                                                                                                                                                      |                                                                                        |                                                                            |                                                                             |                                                                                                                     |
|----------------------------------------------------------------------------------------------------------------------------------------------------------------------|----------------------------------------------------------------------------------------|----------------------------------------------------------------------------|-----------------------------------------------------------------------------|---------------------------------------------------------------------------------------------------------------------|
| least two measurement used?                                                                                                                                          |                                                                                        |                                                                            |                                                                             |                                                                                                                     |
| Was the time interval stated?                                                                                                                                        | Time interval adequately described                                                     |                                                                            |                                                                             | Time interval NOT described                                                                                         |
| If anything occurred in the interim period (e.g. intervention, other relevant events), was it adequately described?                                                  | Anything that occurred during the interim period (e.g. treatment) adequately described | Assumable what occurred during the interim period                          | Unclear or NOT described what occurred during the interim period            | If anything occurred in the interim period (e.g. intervention, other relevant events), was it adequately described? |
| Was a proportion of the patients changed (i.e. improvement or deterioration)?                                                                                        | Part of the patients were changed (evidence provided)                                  | NO evidence provided, but assumable that part of the patients were changed | Unclear if part of the patients were changed                                | Patients were NOT changed                                                                                           |
| <b>For constructs for which a gold standard was not available:</b>                                                                                                   |                                                                                        |                                                                            |                                                                             |                                                                                                                     |
| Were hypotheses about changes in scores formulated a priori (i.e. before data collection)?                                                                           | Hypotheses formulated a priori                                                         |                                                                            | Hypotheses vague or not formulated but possible to deduce what was expected | Unclear what was expected                                                                                           |
| Was the expected <i>direction</i> of correlations or mean differences of the change scores of HR-PRO instruments included in these hypotheses?                       | Expected direction of the correlations or differences stated                           | Expected direction of the correlations or differences NOT stated           |                                                                             |                                                                                                                     |
| Were the expected absolute or relative <i>magnitude</i> of correlations or mean differences of the change scores of HR-PRO instruments included in these hypotheses? | Expected magnitude of the correlations or differences stated                           | Expected magnitude of the correlations or differences NOT stated           |                                                                             |                                                                                                                     |
| Was an adequate description provided of the comparator instrument(s)?                                                                                                | Adequate description of the constructs measured by the comparator instrument(s)        |                                                                            | Poor description of the constructs measured by the comparator instrument(s) | NO description of the constructs measured by the comparator instrument(s)                                           |
| Were the measurement                                                                                                                                                 | Adequate measurement                                                                   | Adequate measurement                                                       | Some information on measurement                                             | NO information on the                                                                                               |



|                                                                                                                                       |                                                                                            |                                                                                                           |                                                                                                                                                                        |                                                                              |
|---------------------------------------------------------------------------------------------------------------------------------------|--------------------------------------------------------------------------------------------|-----------------------------------------------------------------------------------------------------------|------------------------------------------------------------------------------------------------------------------------------------------------------------------------|------------------------------------------------------------------------------|
| properties of the comparator instrument(s) adequately described?                                                                      | properties of the comparator instrument(s) in a population similar to the study population | properties of the comparator instrument(s) but not sure if these apply to the study population            | properties (or a reference to a study on measurement properties) of the comparator instrument(s) in any study population                                               | measurement properties of the comparator instrument(s)                       |
| Were there any important flaws in the design or methods of the study?                                                                 | No other important methodological flaws in the design or execution of the study            |                                                                                                           | Other minor methodological flaws in the design or execution of the study (e.g. only data presented on a comparison with an instrument that measures another construct) | Other important methodological flaws in the design or execution of the study |
| Were design and statistical methods adequate for the hypotheses to be tested?                                                         | Statistical methods applied appropriate                                                    |                                                                                                           | Statistical methods applied NOT optimal                                                                                                                                | Statistical methods applied NOT appropriate                                  |
| <b>For constructs for which a gold standard was available:</b>                                                                        |                                                                                            |                                                                                                           |                                                                                                                                                                        |                                                                              |
| Can the criterion for change be considered as a reasonable gold standard?                                                             | Criterion used can be considered an adequate 'gold standard' (evidence provided)           | No evidence provided, but assumable that the criterion used can be considered an adequate 'gold standard' | Unclear whether the criterion used can be considered an adequate 'gold standard'                                                                                       | Criterion used can NOT be considered an adequate 'gold standard'             |
| Were there any important flaws in the design or methods of the study?                                                                 | No other important methodological flaws in the design or execution of the study            |                                                                                                           | Other minor methodological flaws in the design or execution of the study                                                                                               | Other important methodological flaws in the design or execution of the study |
| for continuous scores: Were correlations between change scores, or the area under the Receiver Operator Curve (ROC) curve calculated? | Correlations or Area under the ROC Curve (AUC) calculated                                  |                                                                                                           |                                                                                                                                                                        | Correlations or AUC NOT calculated                                           |
| for dichotomous scales: Were sensitivity and specificity (changed versus                                                              | Sensitivity and specificity calculated                                                     |                                                                                                           |                                                                                                                                                                        | Sensitivity and specificity NOT calculated                                   |

|                             |  |  |  |  |
|-----------------------------|--|--|--|--|
| not changed)<br>determined? |  |  |  |  |
|-----------------------------|--|--|--|--|

Carter/Br J Sports Med/ 1997

**STEP1: Evaluated measurement properties in the article**

| Check if present | Property                                          | Location |
|------------------|---------------------------------------------------|----------|
|                  | Reliability                                       | Box A    |
|                  | Agreement/Measurement Error                       | Box B    |
| ✓                | Hypothesis Testing / Construct validity           | Box C    |
|                  | Criterion/Predictive Validity                     | Box D    |
| ✓                | Responsiveness                                    | Box E    |
|                  | Predictive validity/Criterion/Predictive Validity | Box F    |

**Step 2. Determining if a study meets the standards for good methodological quality**

**C. Hypothesis Testing / Construct Validity**

| Design requirements                                                                                           | Excellent                                                    | Good                                                                      | Fair                                                                        | Poor                                 |
|---------------------------------------------------------------------------------------------------------------|--------------------------------------------------------------|---------------------------------------------------------------------------|-----------------------------------------------------------------------------|--------------------------------------|
| Was the percentage of missing items given?<br><b>none</b>                                                     | Percentage of missing items described                        | <b>Percentage of missing items NOT described</b>                          | NA                                                                          | NA                                   |
| Was there a description of how missing items were handled? <b>none</b>                                        | Described how missing items were handled                     | <b>Not described but it can be deduced how missing items were handled</b> | Not clear how missing items were handled                                    |                                      |
| Was the sample size included in the analysis adequate?                                                        | Adequate sample size (≥100 per analysis)                     | <b>Good sample size (50-99 per analysis)<br/>50 + 23 controls</b>         | Moderate sample size (30-49 per analysis)                                   | Small sample size (<30 per analysis) |
| Were hypotheses regarding correlations or mean differences formulated a priori (i.e. before data collection)? | <b>hypotheses formulated a priori</b>                        | Minimal number of hypotheses formulate a priori                           | Hypotheses vague or not formulated but possible to deduce what was expected | Unclear what was expected            |
| Was the expected <i>direction</i> of correlations or mean differences included in the hypotheses?             | Expected direction of the correlations or differences stated | <b>Expected direction of the correlations or differences NOT stated -</b> |                                                                             |                                      |
| Was the expected absolute or                                                                                  | Expected magnitude of the                                    | <b>Expected magnitude of the</b>                                          |                                                                             |                                      |

|                                                                                                                |                                                                                                                             |                                                                                                                                               |                                                                                                                                                                        |                                                                              |
|----------------------------------------------------------------------------------------------------------------|-----------------------------------------------------------------------------------------------------------------------------|-----------------------------------------------------------------------------------------------------------------------------------------------|------------------------------------------------------------------------------------------------------------------------------------------------------------------------|------------------------------------------------------------------------------|
| relative <i>magnitude</i> of correlations or mean differences included in the hypotheses?                      | correlations or differences stated                                                                                          | correlations or differences NOT stated                                                                                                        |                                                                                                                                                                        |                                                                              |
| for convergent validity: Was an adequate description provided of the comparator instrument(s)?                 | Adequate description of the constructs measured by the comparator instrument(s)                                             | Adequate description of most of the constructs measured by the comparator instrument(s)                                                       | Poor description of the constructs measured by the comparator instrument(s)                                                                                            | NO description of the constructs measured by the comparator instrument(s)    |
| for convergent validity: Were the measurement properties of the comparator instrument(s) adequately described? | Adequate measurement properties of the comparator instrument(s) in a population similar to the study population IKDC, SF-36 | Adequate measurement properties of the comparator instrument(s) but not sure if these apply to the study population                           | Some information on measurement properties (or a reference to a study on measurement properties) of the comparator instrument(s) in any study population               | No information on the measurement properties of the comparator instrument(s) |
| Were there any important flaws in the design or methods of the study?                                          | No other important methodological flaws in the design or execution of the study                                             |                                                                                                                                               | Other minor methodological flaws in the design or execution of the study (e.g. only data presented on a comparison with an instrument that measures another construct) | Other important methodological flaws in the design or execution of the study |
| Were design and statistical methods adequate for the hypotheses to be tested?                                  | Statistical methods applied appropriate                                                                                     | Assumable that statistical methods were appropriate, e.g. Pearson correlations applied, but distribution of scores or mean (SD) not presented | Statistical methods applied NOT optimal                                                                                                                                | Statistical methods applied NOT appropriate                                  |

### E. Responsiveness

|                                                 |                                       |                                           |                                  |      |
|-------------------------------------------------|---------------------------------------|-------------------------------------------|----------------------------------|------|
| Design requirements                             | Excellent                             | Good                                      | Fair                             | Poor |
| Was the percentage of missing items given? none | Percentage of missing items described | Percentage of missing items NOT described |                                  |      |
| Was there a description of how                  | Described how missing items           | Not described but it can be               | Not clear how missing items were |      |

|                                                                                                                                                          |                                                                                        |                                                                            |                                                                             |                                                                                                                     |
|----------------------------------------------------------------------------------------------------------------------------------------------------------|----------------------------------------------------------------------------------------|----------------------------------------------------------------------------|-----------------------------------------------------------------------------|---------------------------------------------------------------------------------------------------------------------|
| missing items were handled?<br><b>none</b>                                                                                                               | were handled                                                                           | <b>deduced how missing items were handled</b>                              | handled                                                                     |                                                                                                                     |
| Was the sample size included in the analysis adequate?                                                                                                   | Adequate sample size ( $\geq 100$ )                                                    | <b>Good sample size (50-99)</b>                                            | Moderate sample size (30-49)                                                | Small sample size ( $< 30$ )                                                                                        |
| Was a longitudinal design with at least two measurement used?                                                                                            | <b>Longitudinal design used</b>                                                        |                                                                            |                                                                             | No longitudinal design used                                                                                         |
| Was the time interval stated?                                                                                                                            | <b>Time interval adequately described</b>                                              |                                                                            |                                                                             | Time interval NOT described                                                                                         |
| If anything occurred in the interim period (e.g. intervention, other relevant events), was it adequately described?                                      | Anything that occurred during the interim period (e.g. treatment) adequately described | <b>Assumable what occurred during the interim period</b>                   | Unclear or NOT described what occurred during the interim period            | If anything occurred in the interim period (e.g. intervention, other relevant events), was it adequately described? |
| Was a proportion of the patients changed (i.e. improvement or deterioration)?                                                                            | <b>Part of the patients were changed (evidence provided)</b>                           | NO evidence provided, but assumable that part of the patients were changed | Unclear if part of the patients were changed                                | Patients were NOT changed                                                                                           |
| <b>For constructs for which a gold standard was not available:</b>                                                                                       |                                                                                        |                                                                            |                                                                             |                                                                                                                     |
| Were hypotheses about changes in scores formulated a priori (i.e. before data collection)?                                                               | Hypotheses formulated a priori                                                         |                                                                            | Hypotheses vague or not formulated but possible to deduce what was expected | Unclear what was expected                                                                                           |
| Was the expected <i>direction</i> of correlations or mean differences of the change scores of HR-PRO instruments included in these hypotheses?           | Expected direction of the correlations or differences stated                           | Expected direction of the correlations or differences NOT stated           |                                                                             |                                                                                                                     |
| Were the expected absolute or relative <i>magnitude</i> of correlations or mean differences of the change scores of HR-PRO instruments included in these | Expected magnitude of the correlations or differences stated                           | Expected magnitude of the correlations or differences NOT stated           |                                                                             |                                                                                                                     |

|                                                                                       |                                                                                                                 |                                                                                                                     |                                                                                                                                                                        |                                                                              |
|---------------------------------------------------------------------------------------|-----------------------------------------------------------------------------------------------------------------|---------------------------------------------------------------------------------------------------------------------|------------------------------------------------------------------------------------------------------------------------------------------------------------------------|------------------------------------------------------------------------------|
| hypotheses?                                                                           |                                                                                                                 |                                                                                                                     |                                                                                                                                                                        |                                                                              |
| Was an adequate description provided of the comparator instrument(s)?                 | Adequate description of the constructs measured by the comparator instrument(s)                                 |                                                                                                                     | Poor description of the constructs measured by the comparator instrument(s)                                                                                            | NO description of the constructs measured by the comparator instrument(s)    |
| Were the measurement properties of the comparator instrument(s) adequately described? | Adequate measurement properties of the comparator instrument(s) in a population similar to the study population | Adequate measurement properties of the comparator instrument(s) but not sure if these apply to the study population | Some information on measurement properties (or a reference to a study on measurement properties) of the comparator instrument(s) in any study population               | NO information on the measurement properties of the comparator instrument(s) |
| Were there any important flaws in the design or methods of the study?                 | No other important methodological flaws in the design or execution of the study                                 |                                                                                                                     | Other minor methodological flaws in the design or execution of the study (e.g. only data presented on a comparison with an instrument that measures another construct) | Other important methodological flaws in the design or execution of the study |
| Were design and statistical methods adequate for the hypotheses to be tested?         | Statistical methods applied appropriate                                                                         |                                                                                                                     | Statistical methods applied NOT optimal                                                                                                                                | Statistical methods applied NOT appropriate                                  |
| <b>For constructs for which a gold standard was available:</b>                        |                                                                                                                 |                                                                                                                     |                                                                                                                                                                        |                                                                              |
| Can the criterion for change be considered as a reasonable gold standard?             | Criterion used can be considered an adequate 'gold standard' (evidence provided)                                | No evidence provided, but assumable that the criterion used can be considered an adequate 'gold standard'           | Unclear whether the criterion used can be considered an adequate 'gold standard'                                                                                       | Criterion used can NOT be considered an adequate 'gold standard'             |
| Were there any important flaws in the design or methods of the study?                 | No other important methodological flaws in the design or execution of the study                                 |                                                                                                                     | Other minor methodological flaws in the design or execution of the study                                                                                               | Other important methodological flaws in the design or execution of the study |
| for continuous scores: Were correlations between change scores, or the area           | Correlations or Area under the ROC Curve (AUC) calculated                                                       |                                                                                                                     |                                                                                                                                                                        | Correlations or AUC NOT calculated                                           |

|                                                                                                   |                                        |  |  |                                            |
|---------------------------------------------------------------------------------------------------|----------------------------------------|--|--|--------------------------------------------|
| under the Receiver Operator Curve (ROC) curve calculated?                                         |                                        |  |  |                                            |
| for dichotomous scales: Were sensitivity and specificity (changed versus not changed) determined? | Sensitivity and specificity calculated |  |  | Sensitivity and specificity NOT calculated |

Crossley/J Orthop Res/ 2007

**STEP1: Evaluated measurement properties in the article**

| Check if present | Property                                | Location |
|------------------|-----------------------------------------|----------|
| ✓                | Reliability                             | Box A    |
|                  | Agreement/Measurement Error             | Box B    |
|                  | Hypothesis Testing / Construct validity | Box C    |
| ✓                | Criterion/Predictive Validity           | Box D    |
|                  | Responsiveness                          | Box E    |

**Step 2. Determining if a study meets the standards for good methodological quality**

**A. Reliability n=10**

| Design requirements                                                                         | Excellent                                   | Good                                                                         | Fair                                               | Poor                              |
|---------------------------------------------------------------------------------------------|---------------------------------------------|------------------------------------------------------------------------------|----------------------------------------------------|-----------------------------------|
| Was the percentage of missing subjects given?<br><b>none</b>                                | Percentage of missing subjects described    | <b>Percentage of missing subjects NOT described</b>                          |                                                    |                                   |
| Was there a description of how missing subjects were handled? <b>none</b>                   | Described how missing subjects were handled | <b>Not described but it can be deduced how missing subjects were handled</b> | Not clear how missing subjects were handled        |                                   |
| Was the sample size included in the analysis adequate?                                      | Adequate sample size ( $\geq 100$ )         | Good sample size (50-99)                                                     | Moderate sample size (30-49)                       | <b>Small sample size (&lt;30)</b> |
| Were at least two measurements available?<br>Intra and inter <b>intra only</b>              | At least two measurements                   |                                                                              |                                                    | <b>Only one measurement</b>       |
| Were the administrations independent? <b>Intra</b>                                          | <b>Independent measurements</b>             | Assumable that the measurements were independent                             | Doubtful whether the measurements were independent | Measurements NOT independent      |
| Was the time interval stated?<br><b>Intra</b>                                               | <b>Time interval stated</b>                 |                                                                              | Time interval NOT stated                           |                                   |
| Were patients stable in the interim period on the construct to be measured?<br><b>Intra</b> | Patients were stable (evidence provided)    | <b>Assumable that patients were stable</b>                                   | Unclear if patients were stable                    | Patients were NOT stable          |
| Was the time interval                                                                       | <b>Time interval</b>                        |                                                                              | Doubtful                                           | Time interval                     |

|                                                                                                                            |                                                                                                    |                                                                                                                                                                                                                                                |                                                                                                                                                                                                                           |                                                                                                 |
|----------------------------------------------------------------------------------------------------------------------------|----------------------------------------------------------------------------------------------------|------------------------------------------------------------------------------------------------------------------------------------------------------------------------------------------------------------------------------------------------|---------------------------------------------------------------------------------------------------------------------------------------------------------------------------------------------------------------------------|-------------------------------------------------------------------------------------------------|
| appropriate?<br>Intra                                                                                                      | appropriate-<br>7-10 days                                                                          |                                                                                                                                                                                                                                                | whether time<br>interval was<br>appropriate                                                                                                                                                                               | NOT<br>appropriate                                                                              |
| Were the test conditions<br>similar for both<br>measurements? e.g. type of<br>administration, environment,<br>instructions | Test<br>conditions<br>were similar<br>(evidence<br>provided)                                       | Assumable<br>that test<br>conditions<br>were similar                                                                                                                                                                                           | Unclear if test<br>conditions<br>were similar                                                                                                                                                                             | Test<br>conditions<br>were NOT<br>similar                                                       |
| Were there any important<br>flaws in the design or<br>methods of the study?<br>Intra                                       | No other<br>important<br>methodologica<br>l flaws in the<br>design or<br>execution of<br>the study |                                                                                                                                                                                                                                                | Other minor<br>methodologica<br>l flaws in the<br>design or<br>execution of<br>the study                                                                                                                                  | Other<br>important<br>methodologica<br>l flaws in the<br>design or<br>execution of<br>the study |
| for continuous scores: Was an<br>intraclass correlation<br>coefficient (ICC) calculated?                                   | ICC calculated<br>and model or<br>formula of the<br>ICC is<br>described                            | ICC calculated<br>but model or<br>formula of the<br>ICC not<br>described or<br>not optimal.<br>Pearson or<br>Spearman<br>correlation<br>coefficient<br>calculated<br>with evidence<br>provided that<br>no systematic<br>change has<br>occurred | Pearson or<br>Spearman<br>correlation<br>coefficient<br>calculated<br>WITHOUT<br>evidence<br>provided that<br>no systematic<br>change has<br>occurred or<br>WITH<br>evidence that<br>systematic<br>change has<br>occurred | No ICC or<br>Pearson or<br>Spearman<br>correlations<br>calculated                               |
| For<br>dichotomous/nominal/ordina<br>l scores: Was kappa<br>calculated?                                                    | Kappa<br>calculated                                                                                |                                                                                                                                                                                                                                                |                                                                                                                                                                                                                           | Only<br>percentage<br>agreement<br>calculated                                                   |
| for ordinal scores: Was a<br>weighted kappa calculated?                                                                    | Weighted<br>Kappa<br>calculated                                                                    |                                                                                                                                                                                                                                                | Unweighted<br>Kappa<br>calculated                                                                                                                                                                                         | Only<br>percentage<br>agreement<br>calculated                                                   |
| for ordinal scores: Was the<br>weighting scheme described?<br>e.g. linear, quadratic                                       | Weighting<br>scheme<br>described                                                                   | Weighting<br>scheme NOT<br>described                                                                                                                                                                                                           |                                                                                                                                                                                                                           |                                                                                                 |

**D. Criterion/Predictive Validity (Predictive in this case n= 58 but only 27 used in analysis)**

| Design<br>requirements                                   | Excellent                                      | Good                                                             | Fair                                           | Poor |
|----------------------------------------------------------|------------------------------------------------|------------------------------------------------------------------|------------------------------------------------|------|
| Was the<br>percentage of<br>missing items<br>given? none | Percentage of<br>missing items<br>described    | Percentage of<br>missing items NOT<br>described                  | NA                                             | NA   |
| Was there a<br>description of<br>how missing             | Described how<br>missing items<br>were handled | Not described but it<br>can be deduced how<br>missing items were | Not clear how<br>missing items<br>were handled |      |

|                                                                                                      |                                                                                         |                                                                                                           |                                                                                  |                                                                       |
|------------------------------------------------------------------------------------------------------|-----------------------------------------------------------------------------------------|-----------------------------------------------------------------------------------------------------------|----------------------------------------------------------------------------------|-----------------------------------------------------------------------|
| items were handled? <b>none</b>                                                                      |                                                                                         | <b>handled- did not use controls in the final linear regression model</b>                                 |                                                                                  |                                                                       |
| Was the sample size included in the analysis adequate?                                               | Adequate sample size ( $\geq 100$ )                                                     | Good sample size (50-99)                                                                                  | Moderate sample size (30-49)                                                     | <b>Small sample size (&lt;30) N=27</b>                                |
| Can the criterion used or employed be considered as a reasonable 'gold standard'?                    | <b>Criterion used can be considered an adequate 'gold standard' (evidence provided)</b> | No evidence provided, but assumable that the criterion used can be considered an adequate 'gold standard' | Unclear whether the criterion used can be considered an adequate 'gold standard' | Criterion used can NOT be considered an adequate 'gold standard'      |
| Were there any important flaws in the design or methods of the study?                                | <b>No other important methodological flaws in the design or execution of the study</b>  | Other minor methodological flaws in the design or execution of the study                                  | Other important methodological flaws in the design or execution of the study     | Were there any important flaws in the design or methods of the study? |
| for continuous scores: Were correlations, or the area under the receiver operating curve calculated? | <b>Correlations or AUC calculated</b>                                                   |                                                                                                           |                                                                                  | Correlations or AUC NOT calculated                                    |
| for dichotomous scores: Were sensitivity and specificity determined?                                 | <b>Sensitivity and specificity calculated</b>                                           |                                                                                                           |                                                                                  | <b>Sensitivity and specificity NOT calculated</b>                     |

Eastlack/MSSE/ 1999

**STEP1: Evaluated measurement properties in the article**

| Check if present | Property                                | Location |
|------------------|-----------------------------------------|----------|
|                  | Reliability                             | Box A    |
|                  | Agreement/Measurement Error             | Box B    |
| ✓                | Hypothesis Testing / Construct validity | Box C    |
| ✓                | Criterion/Predictive Validity           | Box D    |
|                  | Responsiveness                          | Box E    |

**Step 2. Determining if a study meets the standards for good methodological quality**

**C. Hypothesis Testing / Construct Validity n=45**

| Design requirements                           | Excellent                             | Good                                             | Fair | Poor |
|-----------------------------------------------|---------------------------------------|--------------------------------------------------|------|------|
| Was the percentage of missing items described | Percentage of missing items described | <b>Percentage of missing items NOT described</b> | NA   | NA   |



|                                                                                                                        |                                                                                                                 |                                                                                                                     |                                                                                                                                                          |                                                                                                                                     |
|------------------------------------------------------------------------------------------------------------------------|-----------------------------------------------------------------------------------------------------------------|---------------------------------------------------------------------------------------------------------------------|----------------------------------------------------------------------------------------------------------------------------------------------------------|-------------------------------------------------------------------------------------------------------------------------------------|
| given?<br><b>none</b>                                                                                                  |                                                                                                                 |                                                                                                                     |                                                                                                                                                          |                                                                                                                                     |
| Was there a description of how missing items were handled? <b>none</b>                                                 | Described how missing items were handled                                                                        | <b>Not described but it can be deduced how missing items were handled</b>                                           | Not clear how missing items were handled                                                                                                                 |                                                                                                                                     |
| Was the sample size included in the analysis adequate?                                                                 | Adequate sample size ( $\geq 100$ per analysis)                                                                 | Good sample size (50-99 per analysis)                                                                               | <b>Moderate sample size (30-49 per analysis)</b>                                                                                                         | Small sample size ( $< 30$ per analysis)                                                                                            |
| Were hypotheses regarding correlations or mean differences formulated a priori (i.e. before data collection)?          | hypotheses formulated a priori                                                                                  | Minimal number of hypotheses formulate a priori                                                                     | Hypotheses vague or not formulated but possible to deduce what was expected                                                                              | <b>Unclear what was expected</b>                                                                                                    |
| Was the expected <i>direction</i> of correlations or mean differences included in the hypotheses?                      | Expected direction of the correlations or differences stated                                                    | <b>Expected direction of the correlations or differences NOT stated -</b>                                           |                                                                                                                                                          |                                                                                                                                     |
| Was the expected absolute or relative <i>magnitude</i> of correlations or mean differences included in the hypotheses? | Expected magnitude of the correlations or differences stated                                                    | <b>Expected magnitude of the correlations or differences NOT stated</b>                                             |                                                                                                                                                          |                                                                                                                                     |
| for convergent validity: Was an adequate description provided of the comparator instrument(s)?                         | <b>Adequate description of the constructs measured by the comparator instrument(s)</b>                          | Adequate description of most of the constructs measured by the comparator instrument(s)                             | Poor description of the constructs measured by the comparator instrument(s)                                                                              | NO description of the constructs measured by the comparator instrument(s)                                                           |
| for convergent validity: Were the measurement properties of the comparator instrument(s) adequately described?         | Adequate measurement properties of the comparator instrument(s) in a population similar to the study population | Adequate measurement properties of the comparator instrument(s) but not sure if these apply to the study population | Some information on measurement properties (or a reference to a study on measurement properties) of the comparator instrument(s) in any study population | <b>No information on the measurement properties of the comparator instrument(s)</b><br><b>NOTE: First time tested in this study</b> |
| Were there any important flaws                                                                                         | <b>No other important</b>                                                                                       |                                                                                                                     | Other minor methodological                                                                                                                               | Other important methodological                                                                                                      |

|                                                                               |                                                                     |                                                                                                                                               |                                                                                                                                             |                                               |
|-------------------------------------------------------------------------------|---------------------------------------------------------------------|-----------------------------------------------------------------------------------------------------------------------------------------------|---------------------------------------------------------------------------------------------------------------------------------------------|-----------------------------------------------|
| in the design or methods of the study?                                        | <b>methodological flaws in the design or execution of the study</b> |                                                                                                                                               | flaws in the design or execution of the study (e.g. only data presented on a comparison with an instrument that measures another construct) | flaws in the design or execution of the study |
| Were design and statistical methods adequate for the hypotheses to be tested? | <b>Statistical methods applied appropriate</b>                      | Assumable that statistical methods were appropriate, e.g. Pearson correlations applied, but distribution of scores or mean (SD) not presented | Statistical methods applied NOT optimal                                                                                                     | Statistical methods applied NOT appropriate   |

**D. Criterion/Predictive Validity (Predictive in this case)**

| Design requirements                                                               | Excellent                                                                               | Good                                                                                                                                 | Fair                                                                             | Poor                                                                  |
|-----------------------------------------------------------------------------------|-----------------------------------------------------------------------------------------|--------------------------------------------------------------------------------------------------------------------------------------|----------------------------------------------------------------------------------|-----------------------------------------------------------------------|
| Was the percentage of missing items given? <b>none</b>                            | <b>Percentage of missing items described</b>                                            | Percentage of missing items NOT described                                                                                            | NA                                                                               | NA                                                                    |
| Was there a description of how missing items were handled? <b>none</b>            | Described how missing items were handled                                                | <b>Not described but it can be deduced how missing items were handled- did not use controls in the final linear regression model</b> | Not clear how missing items were handled                                         |                                                                       |
| Was the sample size included in the analysis adequate?                            | Adequate sample size ( $\geq 100$ )                                                     | Good sample size (50-99)                                                                                                             | <b>Moderate sample size (30-49)</b>                                              | Small sample size (<30)                                               |
| Can the criterion used or employed be considered as a reasonable 'gold standard'? | <b>Criterion used can be considered an adequate 'gold standard' (evidence provided)</b> | No evidence provided, but assumable that the criterion used can be considered an adequate 'gold standard'                            | Unclear whether the criterion used can be considered an adequate 'gold standard' | Criterion used can NOT be considered an adequate 'gold standard'      |
| Were there any important flaws in the design or methods of the study?             | <b>No other important methodological flaws in the design or execution of the study</b>  | Other minor methodological flaws in the design or execution of the study                                                             | Other important methodological flaws in the design or execution of the study     | Were there any important flaws in the design or methods of the study? |
| for continuous scores: Were                                                       | <b>Correlations or AUC calculated -</b>                                                 |                                                                                                                                      |                                                                                  | Correlations or AUC NOT                                               |

|                                                                          |                                                  |  |  |                                            |
|--------------------------------------------------------------------------|--------------------------------------------------|--|--|--------------------------------------------|
| correlations, or the area under the receiver operating curve calculated? | Multiple regression used for predictive validity |  |  | calculated                                 |
| for dichotomous scores: Were sensitivity and specificity determined?     | Sensitivity and specificity calculated           |  |  | Sensitivity and specificity NOT calculated |

Gauffin/Int J Sports Med/1990

**STEP1: Evaluated measurement properties in the article**

| Check if present | Property                                | Location |
|------------------|-----------------------------------------|----------|
|                  | Reliability                             | Box A    |
|                  | Agreement/Measurement Error             | Box B    |
| ✓                | Hypothesis Testing / Construct validity | Box C    |
|                  | Criterion/Predictive Validity           | Box D    |
|                  | Responsiveness                          | Box E    |

**Step 2. Determining if a study meets the standards for good methodological quality**

**C. Hypothesis Testing / Construct Validity n=30? Never said how many in ref group and no indication whether all were used in analyses**

| Design requirements                                                                                           | Excellent                                       | Good                                                               | Fair                                                                        | Poor                                 |
|---------------------------------------------------------------------------------------------------------------|-------------------------------------------------|--------------------------------------------------------------------|-----------------------------------------------------------------------------|--------------------------------------|
| Was the percentage of missing items given?                                                                    | Percentage of missing items described           | Percentage of missing items NOT described                          | NA                                                                          | NA                                   |
| Was there a description of how missing items were handled?                                                    | Described how missing items were handled        | Not described but it can be deduced how missing items were handled | Not clear how missing items were handled                                    |                                      |
| Was the sample size included in the analysis adequate?                                                        | Adequate sample size ( $\geq 100$ per analysis) | Good sample size (50-99 per analysis)                              | Moderate sample size (30-49 per analysis)                                   | Small sample size (<30 per analysis) |
| Were hypotheses regarding correlations or mean differences formulated a priori (i.e. before data collection)? | hypotheses formulated a priori                  | Minimal number of hypotheses formulate a priori                    | Hypotheses vague or not formulated but possible to deduce what was expected | Unclear what was expected            |

|                                                                                                                        |                                                                                                                 |                                                                                                                                               |                                                                                                                                                                        |                                                                                     |
|------------------------------------------------------------------------------------------------------------------------|-----------------------------------------------------------------------------------------------------------------|-----------------------------------------------------------------------------------------------------------------------------------------------|------------------------------------------------------------------------------------------------------------------------------------------------------------------------|-------------------------------------------------------------------------------------|
| Was the expected <i>direction</i> of correlations or mean differences included in the hypotheses?                      | Expected direction of the correlations or differences stated                                                    | Expected <b>direction of the correlations or differences NOT stated</b> -                                                                     |                                                                                                                                                                        |                                                                                     |
| Was the expected absolute or relative <i>magnitude</i> of correlations or mean differences included in the hypotheses? | Expected magnitude of the correlations or differences stated                                                    | Expected <b>magnitude of the correlations or differences NOT stated</b>                                                                       |                                                                                                                                                                        |                                                                                     |
| for convergent validity: Was an adequate description provided of the comparator instrument(s)?                         | <b>Adequate description of the constructs measured by the comparator instrument(s)</b>                          | Adequate description of most of the constructs measured by the comparator instrument(s)                                                       | Poor description of the constructs measured by the comparator instrument(s)                                                                                            | NO description of the constructs measured by the comparator instrument(s)           |
| for convergent validity: Were the measurement properties of the comparator instrument(s) adequately described?         | Adequate measurement properties of the comparator instrument(s) in a population similar to the study population | Adequate measurement properties of the comparator instrument(s) but not sure if these apply to the study population                           | Some information on measurement properties (or a reference to a study on measurement properties) of the comparator instrument(s) in any study population               | <b>No information on the measurement properties of the comparator instrument(s)</b> |
| Were there any important flaws in the design or methods of the study?                                                  | <b>No other important methodological flaws in the design or execution of the study</b>                          |                                                                                                                                               | Other minor methodological flaws in the design or execution of the study (e.g. only data presented on a comparison with an instrument that measures another construct) | Other important methodological flaws in the design or execution of the study        |
| Were design and statistical methods adequate for the hypotheses to be tested?                                          | <b>Statistical methods applied appropriate</b>                                                                  | Assumable that statistical methods were appropriate, e.g. Pearson correlations applied, but distribution of scores or mean (SD) not presented | Statistical methods applied NOT optimal                                                                                                                                | Statistical methods applied NOT appropriate                                         |

STEP1: Evaluated measurement properties in the article

| Check if present | Property                                | Location |
|------------------|-----------------------------------------|----------|
|                  | Reliability                             | Box A    |
|                  | Agreement/Measurement Error             | Box B    |
|                  | Hypothesis Testing / Construct validity | Box C    |
|                  | Criterion/Predictive Validity           | Box D    |
| ✓                | Responsiveness                          | Box E    |

**Step 2. Determining if a study meets the standards for good methodological quality**

**E. Responsiveness n=27**

| Design requirements                                                                                                 | Excellent                                                                              | Good                                                                       | Fair                                                             | Poor                                                                                                                |
|---------------------------------------------------------------------------------------------------------------------|----------------------------------------------------------------------------------------|----------------------------------------------------------------------------|------------------------------------------------------------------|---------------------------------------------------------------------------------------------------------------------|
| Was the percentage of missing items given?                                                                          | Percentage of missing items described                                                  | Percentage of missing items NOT described                                  |                                                                  |                                                                                                                     |
| Was there a description of how missing items were handled?                                                          | Described how missing items were handled                                               | Not described but it can be deduced how missing items were handled         | Not clear how missing items were handled                         |                                                                                                                     |
| Was the sample size included in the analysis adequate?                                                              | Adequate sample size ( $\geq 100$ )                                                    | Good sample size (50-99)                                                   | Moderate sample size (30-49)                                     | Small sample size (<30)                                                                                             |
| Was a longitudinal design with at least two measurement used?                                                       | Longitudinal design used                                                               |                                                                            |                                                                  | No longitudinal design used                                                                                         |
| Was the time interval stated?                                                                                       | Time interval adequately described                                                     |                                                                            |                                                                  | Time interval NOT described                                                                                         |
| If anything occurred in the interim period (e.g. intervention, other relevant events), was it adequately described? | Anything that occurred during the interim period (e.g. treatment) adequately described | Assumable what occurred during the interim period                          | Unclear or NOT described what occurred during the interim period | If anything occurred in the interim period (e.g. intervention, other relevant events), was it adequately described? |
| Was a proportion of the patients changed (i.e. improvement or deterioration)?                                       | Part of the patients were changed (evidence provided)                                  | NO evidence provided, but assumable that part of the patients were changed | Unclear if part of the patients were changed                     | Patients were NOT changed                                                                                           |
| <b>For constructs for which a gold standard was not available:</b>                                                  |                                                                                        |                                                                            |                                                                  |                                                                                                                     |
| Were hypotheses about changes in scores formulated                                                                  | Hypotheses formulated a priori                                                         |                                                                            | Hypotheses vague or not formulated but possible to               | Unclear what was expected                                                                                           |

|                                                                                                                                                                      |                                                                                                                 |                                                                                                                     |                                                                                                                                                                        |                                                                                     |
|----------------------------------------------------------------------------------------------------------------------------------------------------------------------|-----------------------------------------------------------------------------------------------------------------|---------------------------------------------------------------------------------------------------------------------|------------------------------------------------------------------------------------------------------------------------------------------------------------------------|-------------------------------------------------------------------------------------|
| a priori (i.e. before data collection)?                                                                                                                              |                                                                                                                 |                                                                                                                     | deduce what was expected                                                                                                                                               |                                                                                     |
| Was the expected <i>direction</i> of correlations or mean differences of the change scores of HR-PRO instruments included in these hypotheses?                       | Expected <b>direction of the correlations or differences stated</b>                                             | Expected direction of the correlations or differences NOT stated                                                    |                                                                                                                                                                        |                                                                                     |
| Were the expected absolute or relative <i>magnitude</i> of correlations or mean differences of the change scores of HR-PRO instruments included in these hypotheses? | Expected magnitude of the correlations or differences stated                                                    | Expected <b>magnitude of the correlations or differences NOT stated</b>                                             |                                                                                                                                                                        |                                                                                     |
| Was an adequate description provided of the comparator instrument(s)?                                                                                                | <b>Adequate description of the constructs measured by the comparator instrument(s)</b>                          |                                                                                                                     | Poor description of the constructs measured by the comparator instrument(s)                                                                                            | NO description of the constructs measured by the comparator instrument(s)           |
| Were the measurement properties of the comparator instrument(s) adequately described?                                                                                | Adequate measurement properties of the comparator instrument(s) in a population similar to the study population | Adequate measurement properties of the comparator instrument(s) but not sure if these apply to the study population | Some information on measurement properties (or a reference to a study on measurement properties) of the comparator instrument(s) in any study population               | <b>NO information on the measurement properties of the comparator instrument(s)</b> |
| Were there any important flaws in the design or methods of the study?                                                                                                | <b>No other important methodological flaws in the design or execution of the study</b>                          |                                                                                                                     | Other minor methodological flaws in the design or execution of the study (e.g. only data presented on a comparison with an instrument that measures another construct) | Other important methodological flaws in the design or execution of the study        |
| Were design and statistical methods adequate for the hypotheses to be tested?                                                                                        | <b>Statistical methods applied appropriate</b>                                                                  |                                                                                                                     | Statistical methods applied NOT optimal                                                                                                                                | Statistical methods applied NOT appropriate                                         |
| <b>For constructs for which a gold standard was available:</b>                                                                                                       |                                                                                                                 |                                                                                                                     |                                                                                                                                                                        |                                                                                     |

|                                                                                                                                       |                                                                                  |                                                                                                           |                                                                                  |                                                                              |
|---------------------------------------------------------------------------------------------------------------------------------------|----------------------------------------------------------------------------------|-----------------------------------------------------------------------------------------------------------|----------------------------------------------------------------------------------|------------------------------------------------------------------------------|
| Can the criterion for change be considered as a reasonable gold standard?                                                             | Criterion used can be considered an adequate 'gold standard' (evidence provided) | No evidence provided, but assumable that the criterion used can be considered an adequate 'gold standard' | Unclear whether the criterion used can be considered an adequate 'gold standard' | Criterion used can NOT be considered an adequate 'gold standard'             |
| Were there any important flaws in the design or methods of the study?                                                                 | No other important methodological flaws in the design or execution of the study  |                                                                                                           | Other minor methodological flaws in the design or execution of the study         | Other important methodological flaws in the design or execution of the study |
| for continuous scores: Were correlations between change scores, or the area under the Receiver Operator Curve (ROC) curve calculated? | Correlations or Area under the ROC Curve (AUC) calculated                        |                                                                                                           |                                                                                  | Correlations or AUC NOT calculated                                           |
| for dichotomous scales: Were sensitivity and specificity (changed versus not changed) determined?                                     | Sensitivity and specificity calculated                                           |                                                                                                           |                                                                                  | Sensitivity and specificity NOT calculated                                   |

Hurd/Am J Sports Med/2008

**STEP1: Evaluated measurement properties in the article**

| Check if present | Property                                | Location |
|------------------|-----------------------------------------|----------|
|                  | Reliability                             | Box A    |
|                  | Agreement/Measurement Error             | Box B    |
|                  | Hypothesis Testing / Construct validity | Box C    |
| ✓                | Criterion/ <b>Predictive Validity</b>   | Box D    |
|                  | Responsiveness                          | Box E    |

**Step 2. Determining if a study meets the standards for good methodological quality**

**D. Criterion/Predictive Validity (**Predictive in this case**) N= 345**

| Design requirements                                    | Excellent                                    | Good                                           | Fair                        | Poor |
|--------------------------------------------------------|----------------------------------------------|------------------------------------------------|-----------------------------|------|
| Was the percentage of missing items given? <b>none</b> | <b>Percentage of missing items described</b> | Percentage of missing items NOT described      | NA                          | NA   |
| Was there a description of                             | Described how missing items were             | <b>Not described but it can be deduced how</b> | Not clear how missing items |      |

|                                                                                                      |                                                                                                                     |                                                                                                           |                                                                                         |                                                                       |
|------------------------------------------------------------------------------------------------------|---------------------------------------------------------------------------------------------------------------------|-----------------------------------------------------------------------------------------------------------|-----------------------------------------------------------------------------------------|-----------------------------------------------------------------------|
| how missing items were handled? <b>none</b>                                                          | handled                                                                                                             | <b>missing items were handled- did not use controls in the final linear regression model</b>              | were handled                                                                            |                                                                       |
| Was the sample size included in the analysis adequate?                                               | <b>Adequate sample size (<math>\geq 100</math>)</b>                                                                 | Good sample size (50-99)                                                                                  | Moderate sample size (30-49)                                                            | Small sample size (<30)                                               |
| Can the criterion used or employed be considered as a reasonable 'gold standard'?                    | Criterion used can be considered an adequate 'gold standard' (evidence provided)                                    | No evidence provided, but assumable that the criterion used can be considered an adequate 'gold standard' | <b>Unclear whether the criterion used can be considered an adequate 'gold standard'</b> | Criterion used can NOT be considered an adequate 'gold standard'      |
| Were there any important flaws in the design or methods of the study?                                | <b>No other important methodological flaws in the design or execution of the study</b>                              | Other minor methodological flaws in the design or execution of the study                                  | Other important methodological flaws in the design or execution of the study            | Were there any important flaws in the design or methods of the study? |
| for continuous scores: Were correlations, or the area under the receiver operating curve calculated? | <b>Correlations or AUC calculated – since it was predictive validity, a hierarchical regression method was used</b> |                                                                                                           |                                                                                         | Correlations or AUC NOT calculated                                    |
| for dichotomous scores: Were sensitivity and specificity determined?                                 | Sensitivity and specificity calculated                                                                              |                                                                                                           |                                                                                         | Sensitivity and specificity NOT calculated                            |

Koutras/Int J Sports Med/2009

**STEP1: Evaluated measurement properties in the article**

| Check if present | Property                                | Location     |
|------------------|-----------------------------------------|--------------|
|                  | Reliability                             | Box A        |
|                  | Agreement/Masurement Error              | Box B        |
|                  | Hypothesis Testing / Construct validity | <b>Box C</b> |
|                  | Criterion/ <b>Predictive Validity</b>   | Box D        |
| ✓                | Responsiveness                          | Box E        |

**Step 2. Determining if a study meets the standards for good methodological quality**

**E. Responsiveness n=20**

| Design requirements   | Excellent                          | Good                        | Fair | Poor |
|-----------------------|------------------------------------|-----------------------------|------|------|
| Was the percentage of | <b>Percentage of missing items</b> | Percentage of missing items |      |      |



|                                                                                                                                                |                                                                                        |                                                                            |                                                                             |                                                                                                                     |
|------------------------------------------------------------------------------------------------------------------------------------------------|----------------------------------------------------------------------------------------|----------------------------------------------------------------------------|-----------------------------------------------------------------------------|---------------------------------------------------------------------------------------------------------------------|
| missing items given?                                                                                                                           | described                                                                              | NOT described                                                              |                                                                             |                                                                                                                     |
| Was there a description of how missing items were handled?                                                                                     | Described how missing items were handled                                               | Not described but it can be deduced how missing items were handled         | Not clear how missing items were handled                                    |                                                                                                                     |
| Was the sample size included in the analysis adequate?                                                                                         | Adequate sample size ( $\geq 100$ )                                                    | Good sample size (50-99)                                                   | Moderate sample size (30-49)                                                | Small sample size (<30)                                                                                             |
| Was a longitudinal design with at least two measurement used?                                                                                  | Longitudinal design used                                                               |                                                                            |                                                                             | No longitudinal design used                                                                                         |
| Was the time interval stated?                                                                                                                  | Time interval adequately described                                                     |                                                                            |                                                                             | Time interval NOT described                                                                                         |
| If anything occurred in the interim period (e.g. intervention, other relevant events), was it adequately described?                            | Anything that occurred during the interim period (e.g. treatment) adequately described | Assumable what occurred during the interim period                          | Unclear or NOT described what occurred during the interim period            | If anything occurred in the interim period (e.g. intervention, other relevant events), was it adequately described? |
| Was a proportion of the patients changed (i.e. improvement or deterioration)?                                                                  | Part of the patients were changed (evidence provided)                                  | NO evidence provided, but assumable that part of the patients were changed | Unclear if part of the patients were changed                                | Patients were NOT changed                                                                                           |
| <b>For constructs for which a gold standard was not available:</b>                                                                             |                                                                                        |                                                                            |                                                                             |                                                                                                                     |
| Were hypotheses about changes in scores formulated a priori (i.e. before data collection)?                                                     | Hypotheses formulated a priori                                                         |                                                                            | Hypotheses vague or not formulated but possible to deduce what was expected | Unclear what was expected                                                                                           |
| Was the expected <i>direction</i> of correlations or mean differences of the change scores of HR-PRO instruments included in these hypotheses? | Expected direction of the correlations or differences stated                           | Expected direction of the correlations or differences NOT stated           |                                                                             |                                                                                                                     |
| Were the expected absolute or relative <i>magnitude</i> of correlations or mean differences                                                    | Expected magnitude of the correlations or differences stated                           | Expected magnitude of the correlations or differences NOT stated           |                                                                             |                                                                                                                     |

|                                                                                       |                                                                                                                 |                                                                                                                     |                                                                                                                                                                        |                                                                              |
|---------------------------------------------------------------------------------------|-----------------------------------------------------------------------------------------------------------------|---------------------------------------------------------------------------------------------------------------------|------------------------------------------------------------------------------------------------------------------------------------------------------------------------|------------------------------------------------------------------------------|
| of the change scores of HR-PRO instruments included in these hypotheses?              |                                                                                                                 |                                                                                                                     |                                                                                                                                                                        |                                                                              |
| Was an adequate description provided of the comparator instrument(s)?                 | Adequate description of the constructs measured by the comparator instrument(s)                                 |                                                                                                                     | Poor description of the constructs measured by the comparator instrument(s)                                                                                            | NO description of the constructs measured by the comparator instrument(s)    |
| Were the measurement properties of the comparator instrument(s) adequately described? | Adequate measurement properties of the comparator instrument(s) in a population similar to the study population | Adequate measurement properties of the comparator instrument(s) but not sure if these apply to the study population | Some information on measurement properties (or a reference to a study on measurement properties) of the comparator instrument(s) in any study population               | NO information on the measurement properties of the comparator instrument(s) |
| Were there any important flaws in the design or methods of the study?                 | No other important methodological flaws in the design or execution of the study                                 |                                                                                                                     | Other minor methodological flaws in the design or execution of the study (e.g. only data presented on a comparison with an instrument that measures another construct) | Other important methodological flaws in the design or execution of the study |
| Were design and statistical methods adequate for the hypotheses to be tested?         | Statistical methods applied appropriate                                                                         |                                                                                                                     | Statistical methods applied NOT optimal                                                                                                                                | Statistical methods applied NOT appropriate                                  |
| <b>For constructs for which a gold standard was available:</b>                        |                                                                                                                 |                                                                                                                     |                                                                                                                                                                        |                                                                              |
| Can the criterion for change be considered as a reasonable gold standard?             | Criterion used can be considered an adequate 'gold standard' (evidence provided)                                | No evidence provided, but assumable that the criterion used can be considered an adequate 'gold standard'           | Unclear whether the criterion used can be considered an adequate 'gold standard'                                                                                       | Criterion used can NOT be considered an adequate 'gold standard'             |
| Were there any important flaws in the design or methods of the study?                 | No other important methodological flaws in the design or execution of the study                                 |                                                                                                                     | Other minor methodological flaws in the design or execution of the study                                                                                               | Other important methodological flaws in the design or execution of the study |
| for continuous                                                                        | Correlations or                                                                                                 |                                                                                                                     |                                                                                                                                                                        | Correlations or                                                              |

|                                                                                                                        |                                                   |  |  |                                                       |
|------------------------------------------------------------------------------------------------------------------------|---------------------------------------------------|--|--|-------------------------------------------------------|
| scores: Were correlations between change scores, or the area under the Receiver Operator Curve (ROC) curve calculated? | Area under the ROC Curve (AUC) calculated         |  |  | AUC NOT calculated                                    |
| <del>for dichotomous scales: Were sensitivity and specificity (changed versus not changed) determined?</del>           | <del>Sensitivity and specificity calculated</del> |  |  | <del>Sensitivity and specificity NOT calculated</del> |

Myer/JOSPT/2011

**STEP1: Evaluated measurement properties in the article**

| Check if present | Property                                | Location |
|------------------|-----------------------------------------|----------|
|                  | Reliability                             | Box A    |
|                  | Agreement/Measurement Error             | Box B    |
| ✓                | Hypothesis Testing / Construct validity | Box C    |
|                  | Criterion/Predictive Validity           | Box D    |
|                  | Responsiveness                          | Box E    |

**Step 2. Determining if a study meets the standards for good methodological quality**

**C. Hypothesis Testing / Construct Validity N= 18**

| Design requirements                                                         | Excellent                                       | Good                                                               | Fair                                                               | Poor                                           |
|-----------------------------------------------------------------------------|-------------------------------------------------|--------------------------------------------------------------------|--------------------------------------------------------------------|------------------------------------------------|
| Was the percentage of missing items given?<br><b>none</b>                   | <b>Percentage of missing items described</b>    | Percentage of missing items NOT described                          | NA                                                                 | NA                                             |
| Was there a description of how missing items were handled?<br><b>unsure</b> | Described how missing items were handled        | Not described but it can be deduced how missing items were handled | <b>Not clear how missing items were handled</b>                    |                                                |
| Was the sample size included in the analysis adequate?                      | Adequate sample size ( $\geq 100$ per analysis) | Good sample size (50-99 per analysis)                              | Moderate sample size (30-49 per analysis)                          | <b>Small sample size (&lt;30 per analysis)</b> |
| Were hypotheses regarding correlations or mean differences                  | <b>hypotheses formulated a priori</b>           | Minimal number of hypotheses formulate a priori                    | Hypotheses vague or not formulated but possible to deduce what was | Unclear what was expected                      |

|                                                                                                                        |                                                                                                                 |                                                                                                                                     |                                                                                                                                                                        |                                                                              |
|------------------------------------------------------------------------------------------------------------------------|-----------------------------------------------------------------------------------------------------------------|-------------------------------------------------------------------------------------------------------------------------------------|------------------------------------------------------------------------------------------------------------------------------------------------------------------------|------------------------------------------------------------------------------|
| formulated a priori (i.e. before data collection)?                                                                     |                                                                                                                 |                                                                                                                                     | expected                                                                                                                                                               |                                                                              |
| Was the expected <i>direction</i> of correlations or mean differences included in the hypotheses?                      | Expected <b>direction of the correlations or differences stated</b>                                             | Expected direction of the correlations or differences NOT stated -                                                                  |                                                                                                                                                                        |                                                                              |
| Was the expected absolute or relative <i>magnitude</i> of correlations or mean differences included in the hypotheses? | Expected magnitude of the correlations or differences stated                                                    | Expected <b>magnitude of the correlations or differences NOT stated</b>                                                             |                                                                                                                                                                        |                                                                              |
| for convergent validity: Was an adequate description provided of the comparator instrument(s)?                         | Adequate description of the constructs measured by the comparator instrument(s)                                 | Adequate description of most of the constructs measured by the comparator instrument(s)                                             | Poor description of the constructs measured by the comparator instrument(s)                                                                                            | NO description of the constructs measured by the comparator instrument(s)    |
| for convergent validity: Were the measurement properties of the comparator instrument(s) adequately described?         | Adequate measurement properties of the comparator instrument(s) in a population similar to the study population | Adequate measurement properties of the comparator instrument(s) but not sure if these apply to the study population                 | Some information on measurement properties (or a reference to a study on measurement properties) of the comparator instrument(s) in any study population               | No information on the measurement properties of the comparator instrument(s) |
| Were there any important flaws in the design or methods of the study?                                                  | No other <b>important methodological flaws in the design or execution of the study</b>                          |                                                                                                                                     | Other minor methodological flaws in the design or execution of the study (e.g. only data presented on a comparison with an instrument that measures another construct) | Other important methodological flaws in the design or execution of the study |
| Were design and statistical methods adequate for the hypotheses to be tested?                                          | <b>Statistical methods applied appropriate</b>                                                                  | Assumable that statistical methods were appropriate, e.g. Pearson correlations applied, but distribution of scores or mean (SD) not | Statistical methods applied NOT optimal                                                                                                                                | Statistical methods applied NOT appropriate                                  |

|  |  |           |  |  |
|--|--|-----------|--|--|
|  |  | presented |  |  |
|--|--|-----------|--|--|

Nagano/ Open Sports Medicine Journal/2010

**STEP1: Evaluated measurement properties in the article**

| Check if present | Property                                | Location |
|------------------|-----------------------------------------|----------|
| ✓                | Reliability                             | Box A    |
|                  | Agreement/Measurement Error             | Box B    |
|                  | Hypothesis Testing / Construct validity | Box C    |
| ✓                | Criterion/ <b>Predictive Validity</b>   | Box D    |
|                  | Responsiveness                          | Box E    |

**Step 2. Determining if a study meets the standards for good methodological quality**

**A. Reliability n=14 subjects**

| Design requirements                                                                                            | Excellent                                        | Good                                                                         | Fair                                                  | Poor                              |
|----------------------------------------------------------------------------------------------------------------|--------------------------------------------------|------------------------------------------------------------------------------|-------------------------------------------------------|-----------------------------------|
| Was the percentage of missing subjects given?<br><b>Not addressed</b>                                          | Percentage of missing subjects described         | <b>Percentage of missing subjects NOT described</b>                          |                                                       |                                   |
| Was there a description of how missing subjects were handled?                                                  | Described how missing subjects were handled      | Not described but it can be deduced how missing subjects were <b>handled</b> | <b>Not clear how missing subjects were handled</b>    |                                   |
| Was the sample size included in the analysis adequate?                                                         | Adequate sample size ( $\geq 100$ )              | Good sample size (50-99)                                                     | Moderate sample size (30-49)                          | <b>Small sample size (&lt;30)</b> |
| Were at least two measurements available?<br>Intra and inter <b>intra only</b>                                 | At least two measurements                        |                                                                              |                                                       | <b>Only one measurement</b>       |
| Were the administrations independent? Intra                                                                    | Independent measurements                         | <b>Assumable that the measurements were independent</b>                      | Doubtful whether the measurements were independent    | Measurements NOT independent      |
| Was the time interval stated?<br>Intra                                                                         | <b>Time interval stated</b>                      |                                                                              | Time interval NOT stated                              |                                   |
| Were patients stable in the interim period on the construct to be measured?<br>Intra                           | Patients were stable (evidence provided)         | <b>Assumable that patients were stable</b>                                   | Unclear if patients were stable                       | Patients were NOT stable          |
| Was the time interval appropriate?<br>Intra                                                                    | Time interval appropriate                        |                                                                              | <b>Doubtful whether time interval was appropriate</b> | Time interval NOT appropriate     |
| Were the test conditions similar for both measurements? e.g. type of administration, environment, instructions | Test conditions were similar (evidence provided) | Assumable that test conditions were similar                                  | <b>Unclear if test conditions were similar</b>        | Test conditions were NOT similar  |
| Were there any important                                                                                       | <b>No other</b>                                  |                                                                              | Other minor                                           | Other                             |

|                                                                                    |                                                                               |                                                                                                                                                                                                   |                                                                                                                                                                              |                                                                        |
|------------------------------------------------------------------------------------|-------------------------------------------------------------------------------|---------------------------------------------------------------------------------------------------------------------------------------------------------------------------------------------------|------------------------------------------------------------------------------------------------------------------------------------------------------------------------------|------------------------------------------------------------------------|
| flaws in the design or methods of the study?<br>Intra                              | <b>important methodological flaws in the design or execution of the study</b> |                                                                                                                                                                                                   | methodological flaws in the design or execution of the study                                                                                                                 | important methodological flaws in the design or execution of the study |
| for continuous scores: Was an intraclass correlation coefficient (ICC) calculated? | <b>ICC calculated and model or formula of the ICC is described</b>            | ICC calculated but model or formula of the ICC not described or not optimal. Pearson or Spearman correlation coefficient calculated with evidence provided that no systematic change has occurred | Pearson or Spearman correlation coefficient calculated WITHOUT evidence provided that no systematic change has occurred or WITH evidence that systematic change has occurred | No ICC or Pearson or Spearman correlations calculated                  |
| For dichotomous/nominal/ordinal scores: Was kappa calculated?                      | <b>Kappa calculated</b>                                                       |                                                                                                                                                                                                   |                                                                                                                                                                              | Only percentage agreement calculated                                   |
| for ordinal scores: Was a weighted kappa calculated?                               | <b>Weighted Kappa calculated</b>                                              |                                                                                                                                                                                                   | <b>Unweighted Kappa calculated</b>                                                                                                                                           | Only percentage agreement calculated                                   |
| for ordinal scores: Was the weighting scheme described? e.g. linear, quadratic     | <b>Weighting scheme described</b>                                             | <b>Weighting scheme NOT described</b>                                                                                                                                                             |                                                                                                                                                                              |                                                                        |

**D. Criterion/Predictive Validity (Predictive in this case) N= 59 subjects; 114 legs**

| Design requirements                                        | Excellent                                           | Good                                                                                                                          | Fair                                                                              | Poor                      |
|------------------------------------------------------------|-----------------------------------------------------|-------------------------------------------------------------------------------------------------------------------------------|-----------------------------------------------------------------------------------|---------------------------|
| Was the percentage of missing items given?                 | <b>Percentage of missing items described</b>        | Percentage of missing items NOT described                                                                                     | NA                                                                                | NA                        |
| Was there a description of how missing items were handled? | <b>Described how missing items were handled</b>     | Not described but it can be deduced how missing items were handled- did not use controls in the final linear regression model | Not clear how missing items were handled<br>Not clear if there were missing items |                           |
| Was the sample size included in the analysis adequate?     | <b>Adequate sample size (<math>\geq 100</math>)</b> | Good sample size (50-99)                                                                                                      | Moderate sample size (30-49)                                                      | Small sample size (<30)   |
| Can the criterion used or                                  | Criterion used can be considered an                 | No evidence provided, but                                                                                                     | <b>Unclear whether the criterion used</b>                                         | Criterion used can NOT be |

|                                                                                                      |                                                                                                                                                                                                                                                  |                                                                                 |                                                                              |                                                                       |
|------------------------------------------------------------------------------------------------------|--------------------------------------------------------------------------------------------------------------------------------------------------------------------------------------------------------------------------------------------------|---------------------------------------------------------------------------------|------------------------------------------------------------------------------|-----------------------------------------------------------------------|
| employed be considered as a reasonable 'gold standard'?                                              | adequate 'gold standard' (evidence provided)                                                                                                                                                                                                     | assumable that the criterion used can be considered an adequate 'gold standard' | can be considered an adequate 'gold standard'                                | considered an adequate 'gold standard'                                |
| Were there any important flaws in the design or methods of the study?                                | No other important methodological flaws in the design or execution of the study                                                                                                                                                                  | Other minor methodological flaws in the design or execution of the study        | Other important methodological flaws in the design or execution of the study | Were there any important flaws in the design or methods of the study? |
| for continuous scores: Were correlations, or the area under the receiver operating curve calculated? | Correlations or AUC calculated<br>1. correlation between video peak knee flexion and the anterior reach of the YBT 2. No correlation between YBT and peak knee valgus 3. since it was predictive validity, a stepwise regression method was used |                                                                                 |                                                                              | Correlations or AUC NOT calculated                                    |
| for dichotomous scores: Were sensitivity and specificity determined?                                 | Sensitivity and specificity calculated                                                                                                                                                                                                           |                                                                                 |                                                                              | Sensitivity and specificity NOT calculated                            |

Noyes/Am J Sports Med/1991

STEP1: Evaluated measurement properties in the article

| Check if present | Property                                | Location |
|------------------|-----------------------------------------|----------|
|                  | Reliability                             | Box A    |
|                  | Agreement/Measurement Error             | Box B    |
| ✓                | Hypothesis Testing / Construct validity | Box C    |
| ✓                | Criterion/Predictive Validity           | Box D    |
|                  | Responsiveness                          | Box E    |

Step 2. Determining if a study meets the standards for good methodological quality

C. Hypothesis Testing / Construct Validity n=67

| Design requirements                                | Excellent                             | Good                                      | Fair | Poor |
|----------------------------------------------------|---------------------------------------|-------------------------------------------|------|------|
| Was the percentage of missing items given?<br>none | Percentage of missing items described | Percentage of missing items NOT described | NA   | NA   |

|                                                                                                                        |                                                                                                                 |                                                                                                                     |                                                                                                                                                          |                                                                                     |
|------------------------------------------------------------------------------------------------------------------------|-----------------------------------------------------------------------------------------------------------------|---------------------------------------------------------------------------------------------------------------------|----------------------------------------------------------------------------------------------------------------------------------------------------------|-------------------------------------------------------------------------------------|
| Was there a description of how missing items were handled? <b>none</b>                                                 | Described how missing items were handled                                                                        | <b>Not described but it can be deduced how missing items were handled</b>                                           | Not clear how missing items were handled                                                                                                                 |                                                                                     |
| Was the sample size included in the analysis adequate?                                                                 | Adequate sample size ( $\geq 100$ per analysis)                                                                 | <b>Good sample size (50-99 per analysis)</b>                                                                        | Moderate sample size (30-49 per analysis)                                                                                                                | Small sample size ( $< 30$ per analysis)                                            |
| Were hypotheses regarding correlations or mean differences formulated a priori (i.e. before data collection)?          | hypotheses formulated a priori                                                                                  | Minimal number of hypotheses formulate a priori                                                                     | <b>Hypotheses vague or not formulated but possible to deduce what was expected</b>                                                                       | Unclear what was expected                                                           |
| Was the expected <i>direction</i> of correlations or mean differences included in the hypotheses?                      | Expected direction of the correlations or differences stated                                                    | <b>Expected direction of the correlations or differences NOT stated –</b>                                           |                                                                                                                                                          |                                                                                     |
| Was the expected absolute or relative <i>magnitude</i> of correlations or mean differences included in the hypotheses? | Expected magnitude of the correlations or differences stated                                                    | <b>Expected magnitude of the correlations or differences NOT stated</b>                                             |                                                                                                                                                          |                                                                                     |
| for convergent validity: Was an adequate description provided of the comparator instrument(s)?                         | <b>Adequate description of the constructs measured by the comparator instrument(s)</b>                          | Adequate description of most of the constructs measured by the comparator instrument(s)                             | Poor description of the constructs measured by the comparator instrument(s)                                                                              | NO description of the constructs measured by the comparator instrument(s)           |
| for convergent validity: Were the measurement properties of the comparator instrument(s) adequately described?         | Adequate measurement properties of the comparator instrument(s) in a population similar to the study population | Adequate measurement properties of the comparator instrument(s) but not sure if these apply to the study population | Some information on measurement properties (or a reference to a study on measurement properties) of the comparator instrument(s) in any study population | <b>No information on the measurement properties of the comparator instrument(s)</b> |
| Were there any important flaws                                                                                         | <b>No other important methodological</b>                                                                        |                                                                                                                     | Other minor methodological                                                                                                                               | Other important methodological                                                      |



|                                                                               |                                                                                                                                                                                                                              |                                                                                                                                               |                                                                                                                                             |                                               |
|-------------------------------------------------------------------------------|------------------------------------------------------------------------------------------------------------------------------------------------------------------------------------------------------------------------------|-----------------------------------------------------------------------------------------------------------------------------------------------|---------------------------------------------------------------------------------------------------------------------------------------------|-----------------------------------------------|
| in the design or methods of the study?                                        | flaws in the design or execution of the study                                                                                                                                                                                |                                                                                                                                               | flaws in the design or execution of the study (e.g. only data presented on a comparison with an instrument that measures another construct) | flaws in the design or execution of the study |
| Were design and statistical methods adequate for the hypotheses to be tested? | Statistical methods applied appropriate-single and then multiple linear regression for limb symmetry as dependent variable and only significant correlation was a low one (.49) with isokinetic testing at 60 degrees/second | Assumable that statistical methods were appropriate, e.g. Pearson correlations applied, but distribution of scores or mean (SD) not presented | Statistical methods applied NOT optimal                                                                                                     | Statistical methods applied NOT appropriate   |

#### D. Criterion/Predictive Validity N= 67 subjects

| Design requirements                                                               | Excellent                                                                        | Good                                                                                                                          | Fair                                                                              | Poor                                                                  |
|-----------------------------------------------------------------------------------|----------------------------------------------------------------------------------|-------------------------------------------------------------------------------------------------------------------------------|-----------------------------------------------------------------------------------|-----------------------------------------------------------------------|
| Was the percentage of missing items given? none                                   | Percentage of missing items described                                            | Percentage of missing items NOT described                                                                                     | NA                                                                                | NA                                                                    |
| Was there a description of how missing items were handled?                        | Described how missing items were handled                                         | Not described but it can be deduced how missing items were handled- did not use controls in the final linear regression model | Not clear how missing items were handled<br>Not clear if there were missing items |                                                                       |
| Was the sample size included in the analysis adequate?                            | Adequate sample size ( $\geq 100$ )                                              | Good sample size (50-99)                                                                                                      | Moderate sample size (30-49)                                                      | Small sample size ( $< 30$ )                                          |
| Can the criterion used or employed be considered as a reasonable 'gold standard'? | Criterion used can be considered an adequate 'gold standard' (evidence provided) | No evidence provided, but assumable that the criterion used can be considered an adequate 'gold standard'                     | Unclear whether the criterion used can be considered an adequate 'gold standard'  | Criterion used can NOT be considered an adequate 'gold standard'      |
| Were there any important flaws in the design or methods of the study?             | No other important methodological flaws in the design or execution of the study  | Other minor methodological flaws in the design or execution of the study                                                      | Other important methodological flaws in the design or execution of the study      | Were there any important flaws in the design or methods of the study? |

|                                                                                                      |                                                                                                      |  |  |                                            |
|------------------------------------------------------------------------------------------------------|------------------------------------------------------------------------------------------------------|--|--|--------------------------------------------|
| for continuous scores: Were correlations, or the area under the receiver operating curve calculated? | Correlations or AUC calculated                                                                       |  |  | Correlations or AUC NOT calculated         |
| for dichotomous scores: Were sensitivity and specificity determined?                                 | Sensitivity and specificity calculated<br>Single hop 52;97;<br>LR+ 17.3<br>Timed hop 49;92;LR+ 6.125 |  |  | Sensitivity and specificity NOT calculated |

Purdam/PT in Sport/2003

STEP1: Evaluated measurement properties in the article

| Check if present | Property                                | Location |
|------------------|-----------------------------------------|----------|
| ✓                | Reliability                             | Box A    |
|                  | Agreement/Measurement Error             | Box B    |
|                  | Hypothesis Testing / Construct validity | Box C    |
|                  | Criterion/Predictive Validity           | Box D    |
| ✓                | Responsiveness                          | Box E    |

**Step 2. Determining if a study meets the standards for good methodological quality**

**A. Reliability n=46 subjects**

| Design requirements                                                            | Excellent                                   | Good                                                                  | Fair                                               | Poor                         |
|--------------------------------------------------------------------------------|---------------------------------------------|-----------------------------------------------------------------------|----------------------------------------------------|------------------------------|
| Was the percentage of missing subjects given?                                  | Percentage of missing subjects described    | Percentage of missing subjects NOT described                          |                                                    |                              |
| Was there a description of how missing subjects were handled?                  | Described how missing subjects were handled | Not described but it can be deduced how missing subjects were handled | Not clear how missing subjects were handled        |                              |
| Was the sample size included in the analysis adequate?                         | Adequate sample size ( $\geq 100$ )         | Good sample size (50-99)                                              | Moderate sample size (30-49)                       | Small sample size (<30)      |
| Were at least two measurements available?<br>Intra and inter <b>intra only</b> | At least two measurements                   |                                                                       |                                                    | Only one measurement         |
| Were the administrations independent? Intra                                    | Independent measurements                    | Assumable that the measurements were independent                      | Doubtful whether the measurements were independent | Measurements NOT independent |
| Was the time interval stated?<br>Intra                                         | Time interval stated                        |                                                                       | Time interval NOT stated                           |                              |
| Were patients stable in the interim period on the                              | Patients were stable                        | Assumable that patients                                               | Unclear if patients were                           | Patients were NOT stable     |

|                                                                                                                |                                                                                        |                                                                                                                                                                                                   |                                                                                                                                                                              |                                                                              |
|----------------------------------------------------------------------------------------------------------------|----------------------------------------------------------------------------------------|---------------------------------------------------------------------------------------------------------------------------------------------------------------------------------------------------|------------------------------------------------------------------------------------------------------------------------------------------------------------------------------|------------------------------------------------------------------------------|
| construct to be measured?<br>Intra                                                                             | (evidence provided)                                                                    | were stable                                                                                                                                                                                       | stable                                                                                                                                                                       |                                                                              |
| Was the time interval appropriate?<br>Intra                                                                    | <b>Time interval appropriate</b>                                                       |                                                                                                                                                                                                   | Doubtful whether time interval was appropriate                                                                                                                               | Time interval NOT appropriate                                                |
| Were the test conditions similar for both measurements? e.g. type of administration, environment, instructions | Test conditions were similar (evidence provided)                                       | <b>Assumable that test conditions were similar</b>                                                                                                                                                | Unclear if test conditions were similar                                                                                                                                      | Test conditions were NOT similar                                             |
| Were there any important flaws in the design or methods of the study?<br>Intra                                 | <b>No other important methodological flaws in the design or execution of the study</b> |                                                                                                                                                                                                   | Other minor methodological flaws in the design or execution of the study                                                                                                     | Other important methodological flaws in the design or execution of the study |
| for continuous scores: Was an intraclass correlation coefficient (ICC) calculated?                             | ICC calculated and model or formula of the ICC is described                            | ICC calculated but model or formula of the ICC not described or not optimal. Pearson or Spearman correlation coefficient calculated with evidence provided that no systematic change has occurred | Pearson or Spearman correlation coefficient calculated WITHOUT evidence provided that no systematic change has occurred or WITH evidence that systematic change has occurred | No ICC or Pearson or Spearman correlations calculated                        |
| For dichotomous/nominal/ordinal scores: Was kappa calculated?                                                  | Kappa calculated                                                                       |                                                                                                                                                                                                   |                                                                                                                                                                              | <b>Only percentage agreement calculated</b>                                  |
| for ordinal scores: Was a weighted kappa calculated?                                                           | Weighted Kappa calculated                                                              |                                                                                                                                                                                                   | Unweighted Kappa calculated                                                                                                                                                  | <b>Only percentage agreement calculated – actually TEM calculated</b>        |
| for ordinal scores: Was the weighting scheme described? e.g. linear, quadratic                                 | Weighting scheme described                                                             | Weighting scheme NOT described                                                                                                                                                                    | <b>With TEM- not sure how to answer this</b>                                                                                                                                 |                                                                              |

**E. Responsiveness n=56, then 50 eligible, then 15/17 control and 13/15 case subjects completing 3 testing sessions + 18 more added for reliability study**

|                       |                                    |                             |      |      |
|-----------------------|------------------------------------|-----------------------------|------|------|
| Design requirements   | Excellent                          | Good                        | Fair | Poor |
| Was the percentage of | <b>Percentage of missing items</b> | Percentage of missing items |      |      |

|                                                                                                                                         |                                                                                        |                                                                            |                                                                             |                                                                                                                     |
|-----------------------------------------------------------------------------------------------------------------------------------------|----------------------------------------------------------------------------------------|----------------------------------------------------------------------------|-----------------------------------------------------------------------------|---------------------------------------------------------------------------------------------------------------------|
| missing items given?                                                                                                                    | described                                                                              | NOT described                                                              |                                                                             |                                                                                                                     |
| Was there a description of how missing items were handled?                                                                              | Described how missing items were handled                                               | Not described but it can be deduced how missing items were handled         | Not clear how missing items were handled                                    |                                                                                                                     |
| Was the sample size included in the analysis adequate?                                                                                  | Adequate sample size ( $\geq 100$ )                                                    | Good sample size (50-99)                                                   | Moderate sample size (30-49)                                                | Small sample size (<30)<br>N=28                                                                                     |
| Was a longitudinal design with at least two measurement used?                                                                           | Longitudinal design used                                                               |                                                                            |                                                                             | No longitudinal design used                                                                                         |
| Was the time interval stated?                                                                                                           | Time interval adequately described                                                     |                                                                            |                                                                             | Time interval NOT described                                                                                         |
| If anything occurred in the interim period (e.g. intervention, other relevant events), was it adequately described?                     | Anything that occurred during the interim period (e.g. treatment) adequately described | Assumable what occurred during the interim period                          | Unclear or NOT described what occurred during the interim period            | If anything occurred in the interim period (e.g. intervention, other relevant events), was it adequately described? |
| Was a proportion of the patients changed (i.e. improvement or deterioration)?                                                           | Part of the patients were changed (evidence provided)                                  | NO evidence provided, but assumable that part of the patients were changed | Unclear if part of the patients were changed                                | Patients were NOT changed                                                                                           |
| <b>For constructs for which a gold standard was not available:</b>                                                                      |                                                                                        |                                                                            |                                                                             |                                                                                                                     |
| Were hypotheses about changes in scores formulated a priori (i.e. before data collection)?                                              | Hypotheses formulated a priori                                                         |                                                                            | Hypotheses vague or not formulated but possible to deduce what was expected | Unclear what was expected                                                                                           |
| Was the expected direction of correlations or mean differences of the change scores of HR-PRO instruments included in these hypotheses? | Expected direction of the correlations or differences stated                           | Expected direction of the correlations or differences NOT stated           |                                                                             |                                                                                                                     |
| Were the expected absolute or relative magnitude of correlations or mean differences                                                    | Expected magnitude of the correlations or differences stated                           | Expected magnitude of the correlations or differences NOT stated           |                                                                             |                                                                                                                     |

|                                                                                       |                                                                                                                 |                                                                                                                     |                                                                                                                                                                        |                                                                              |
|---------------------------------------------------------------------------------------|-----------------------------------------------------------------------------------------------------------------|---------------------------------------------------------------------------------------------------------------------|------------------------------------------------------------------------------------------------------------------------------------------------------------------------|------------------------------------------------------------------------------|
| of the change scores of HR-PRO instruments included in these hypotheses?              |                                                                                                                 |                                                                                                                     |                                                                                                                                                                        |                                                                              |
| Was an adequate description provided of the comparator instrument(s)?                 | Adequate description of the constructs measured by the comparator instrument(s)                                 |                                                                                                                     | Poor description of the constructs measured by the comparator instrument(s)                                                                                            | NO description of the constructs measured by the comparator instrument(s)    |
| Were the measurement properties of the comparator instrument(s) adequately described? | Adequate measurement properties of the comparator instrument(s) in a population similar to the study population | Adequate measurement properties of the comparator instrument(s) but not sure if these apply to the study population | Some information on measurement properties (or a reference to a study on measurement properties) of the comparator instrument(s) in any study population               | NO information on the measurement properties of the comparator instrument(s) |
| Were there any important flaws in the design or methods of the study?                 | No other important methodological flaws in the design or execution of the study                                 |                                                                                                                     | Other minor methodological flaws in the design or execution of the study (e.g. only data presented on a comparison with an instrument that measures another construct) | Other important methodological flaws in the design or execution of the study |
| Were design and statistical methods adequate for the hypotheses to be tested?         | Statistical methods applied appropriate                                                                         |                                                                                                                     | Statistical methods applied NOT optimal                                                                                                                                | Statistical methods applied NOT appropriate                                  |
| <b>For constructs for which a gold standard was available:</b>                        |                                                                                                                 |                                                                                                                     |                                                                                                                                                                        |                                                                              |
| Can the criterion for change be considered as a reasonable gold standard?             | Criterion used can be considered an adequate 'gold standard' (evidence provided)                                | No evidence provided, but assumable that the criterion used can be considered an adequate 'gold standard'           | Unclear whether the criterion used can be considered an adequate 'gold standard'                                                                                       | Criterion used can NOT be considered an adequate 'gold standard'             |
| Were there any important flaws in the design or methods of the study?                 | No other important methodological flaws in the design or execution of the study                                 |                                                                                                                     | Other minor methodological flaws in the design or execution of the study                                                                                               | Other important methodological flaws in the design or execution of the study |
| for continuous                                                                        | Correlations or                                                                                                 | Change in 0-10                                                                                                      |                                                                                                                                                                        | Correlations or                                                              |

|                                                                                                                        |                                           |                             |  |                                            |
|------------------------------------------------------------------------------------------------------------------------|-------------------------------------------|-----------------------------|--|--------------------------------------------|
| scores: Were correlations between change scores, or the area under the Receiver Operator Curve (ROC) curve calculated? | Area under the ROC Curve (AUC) calculated | pain scale is interval data |  | AUC NOT calculated                         |
| for dichotomous scales: Were sensitivity and specificity (changed versus not changed) determined?                      | Sensitivity and specificity calculated    |                             |  | Sensitivity and specificity NOT calculated |

Ross/Knee Sport Taumatol/2002

STEP1: Evaluated measurement properties in the article

| Check if present | Property                                | Location |
|------------------|-----------------------------------------|----------|
| ✓                | Reliability                             | Box A    |
|                  | Agreement/Measurement Error             | Box B    |
| ✓                | Hypothesis Testing / Construct validity | Box C    |
|                  | Criterion/Predictive Validity           | Box D    |
|                  | Responsiveness                          | Box E    |

## Step 2. Determining if a study meets the standards for good methodological quality

### A. Reliability n=50 subjects but only 10 for reliability

| Design requirements                                                         | Excellent                                   | Good                                                                  | Fair                                               | Poor                         |
|-----------------------------------------------------------------------------|---------------------------------------------|-----------------------------------------------------------------------|----------------------------------------------------|------------------------------|
| Was the percentage of missing subjects given?                               | Percentage of missing subjects described    | Percentage of missing subjects NOT described                          |                                                    |                              |
| Was there a description of how missing subjects were handled?               | Described how missing subjects were handled | Not described but it can be deduced how missing subjects were handled | Not clear how missing subjects were handled        |                              |
| Was the sample size included in the analysis adequate?                      | Adequate sample size ( $\geq 100$ )         | Good sample size (50-99)                                              | Moderate sample size (30-49)                       | Small sample size (<30)      |
| Were at least two measurements available? Intra and inter <b>intra only</b> | At least two measurements                   |                                                                       |                                                    | Only one measurement         |
| Were the administrations independent? Intra                                 | <b>Independent measurements</b>             | Assumable that the measurements were independent                      | Doubtful whether the measurements were independent | Measurements NOT independent |
| Was the time interval stated? Intra                                         | Time interval stated                        |                                                                       | <b>Time interval NOT stated</b>                    |                              |
| Were patients stable in the interim period on the                           | <b>Patients were stable</b>                 | Assumable that patients                                               | Unclear if patients were                           | Patients were NOT stable     |

|                                                                                                                |                                                                                 |                                                                                                                                                                                                   |                                                                                                                                                                              |                                                                              |
|----------------------------------------------------------------------------------------------------------------|---------------------------------------------------------------------------------|---------------------------------------------------------------------------------------------------------------------------------------------------------------------------------------------------|------------------------------------------------------------------------------------------------------------------------------------------------------------------------------|------------------------------------------------------------------------------|
| construct to be measured?<br>Intra                                                                             | (evidence provided)                                                             | were stable                                                                                                                                                                                       | stable                                                                                                                                                                       |                                                                              |
| Was the time interval appropriate?<br>Intra                                                                    | Time interval appropriate                                                       |                                                                                                                                                                                                   | Doubtful whether time interval was appropriate                                                                                                                               | Time interval NOT appropriate                                                |
| Were the test conditions similar for both measurements? e.g. type of administration, environment, instructions | Test conditions were similar (evidence provided)                                | Assumable that test conditions were similar                                                                                                                                                       | Unclear if test conditions were similar                                                                                                                                      | Test conditions were NOT similar                                             |
| Were there any important flaws in the design or methods of the study?<br>Intra                                 | No other important methodological flaws in the design or execution of the study |                                                                                                                                                                                                   | Other minor methodological flaws in the design or execution of the study                                                                                                     | Other important methodological flaws in the design or execution of the study |
| for continuous scores: Was an intraclass correlation coefficient (ICC) calculated?                             | ICC calculated and model or formula of the ICC is described                     | ICC calculated but model or formula of the ICC not described or not optimal. Pearson or Spearman correlation coefficient calculated with evidence provided that no systematic change has occurred | Pearson or Spearman correlation coefficient calculated WITHOUT evidence provided that no systematic change has occurred or WITH evidence that systematic change has occurred | No ICC or Pearson or Spearman correlations calculated                        |
| For dichotomous/nominal/ordinal scores: Was kappa calculated?                                                  | Kappa calculated                                                                |                                                                                                                                                                                                   |                                                                                                                                                                              | Only percentage agreement calculated                                         |
| for ordinal scores: Was a weighted kappa calculated?                                                           | Weighted Kappa calculated                                                       |                                                                                                                                                                                                   | Unweighted Kappa calculated                                                                                                                                                  | Only percentage agreement calculated – actually TEM calculated               |
| for ordinal scores: Was the weighting scheme described? e.g. linear, quadratic                                 | Weighting scheme described                                                      | Weighting scheme NOT described                                                                                                                                                                    | With TEM – not sure how to answer this                                                                                                                                       |                                                                              |

### C. Hypothesis Testing / Construct Validity

|                                     |                                       |                                           |      |      |
|-------------------------------------|---------------------------------------|-------------------------------------------|------|------|
| Design requirements                 | Excellent                             | Good                                      | Fair | Poor |
| Was the percentage of missing items | Percentage of missing items described | Percentage of missing items NOT described | NA   | NA   |

|                                                                                                                        |                                                                                                                                                   |                                                                                                                     |                                                                                                                                                          |                                                                                                                          |
|------------------------------------------------------------------------------------------------------------------------|---------------------------------------------------------------------------------------------------------------------------------------------------|---------------------------------------------------------------------------------------------------------------------|----------------------------------------------------------------------------------------------------------------------------------------------------------|--------------------------------------------------------------------------------------------------------------------------|
| given?                                                                                                                 |                                                                                                                                                   |                                                                                                                     |                                                                                                                                                          |                                                                                                                          |
| Was there a description of how missing items were handled?                                                             | Described how missing items were handled                                                                                                          | Not described but it can be deduced how missing items were handled                                                  | Not clear how missing items were handled                                                                                                                 |                                                                                                                          |
| Was the sample size included in the analysis adequate?                                                                 | Adequate sample size ( $\geq 100$ per analysis)                                                                                                   | Good sample size (50-99 per analysis)                                                                               | Moderate sample size (30-49 per analysis)                                                                                                                | Small sample size ( $< 30$ per analysis)                                                                                 |
| Were hypotheses regarding correlations or mean differences formulated a priori (i.e. before data collection)?          | hypotheses formulated a priori                                                                                                                    | Minimal number of hypotheses formulate a priori                                                                     | Hypotheses vague or not formulated but possible to deduce what was expected                                                                              | Unclear what was expected                                                                                                |
| Was the expected <i>direction</i> of correlations or mean differences included in the hypotheses?                      | Expected direction of the correlations or differences stated- functional tests correlate positively with self-report                              | Expected direction of the correlations or differences NOT stated -                                                  |                                                                                                                                                          |                                                                                                                          |
| Was the expected absolute or relative <i>magnitude</i> of correlations or mean differences included in the hypotheses? | Expected magnitude of the correlations or differences stated                                                                                      | Expected magnitude of the correlations or differences NOT stated                                                    |                                                                                                                                                          |                                                                                                                          |
| for convergent validity: Was an adequate description provided of the comparator instrument(s)?                         | Adequate description of the constructs measured by the comparator instrument(s)                                                                   | Adequate description of most of the constructs measured by the comparator instrument(s)                             | Poor description of the constructs measured by the comparator instrument(s)                                                                              | NO description of the constructs measured by the comparator instrument(s)                                                |
| for convergent validity: Were the measurement properties of the comparator instrument(s) adequately described?         | Adequate measurement properties of the comparator instrument(s) in a population similar to the study population- KOS, ADLS, SAS used but only the | Adequate measurement properties of the comparator instrument(s) but not sure if these apply to the study population | Some information on measurement properties (or a reference to a study on measurement properties) of the comparator instrument(s) in any study population | No information on the measurement properties of the comparator instrument(s)<br>NOTE:<br>First time tested in this study |



|                                                                               |                                                                                 |                                                                                                                                               |                                                                                                                                                                        |                                                                              |
|-------------------------------------------------------------------------------|---------------------------------------------------------------------------------|-----------------------------------------------------------------------------------------------------------------------------------------------|------------------------------------------------------------------------------------------------------------------------------------------------------------------------|------------------------------------------------------------------------------|
|                                                                               | rel/valid of KOS cited                                                          |                                                                                                                                               |                                                                                                                                                                        |                                                                              |
| Were there any important flaws in the design or methods of the study?         | No other important methodological flaws in the design or execution of the study |                                                                                                                                               | Other minor methodological flaws in the design or execution of the study (e.g. only data presented on a comparison with an instrument that measures another construct) | Other important methodological flaws in the design or execution of the study |
| Were design and statistical methods adequate for the hypotheses to be tested? | Statistical methods applied appropriate                                         | Assumable that statistical methods were appropriate, e.g. Pearson correlations applied, but distribution of scores or mean (SD) not presented | Statistical methods applied NOT optimal                                                                                                                                | Statistical methods applied NOT appropriate                                  |

Ross/Knee Sport Taumatol/2010

STEP1: Evaluated measurement properties in the article

| Check if present | Property                                | Location |
|------------------|-----------------------------------------|----------|
|                  | Reliability                             | Box A    |
|                  | Agreement/Measurement Error             | Box B    |
| ✓                | Hypothesis Testing / Construct validity | Box C    |
|                  | Criterion/Predictive Validity           | Box D    |
|                  | Responsiveness                          | Box E    |

**Step 2. Determining if a study meets the standards for good methodological quality**

**C. Hypothesis Testing / Construct Validity n=48**

| Design requirements                                        | Excellent                                       | Good                                                               | Fair                                      | Poor                                     |
|------------------------------------------------------------|-------------------------------------------------|--------------------------------------------------------------------|-------------------------------------------|------------------------------------------|
| Was the percentage of missing items given?                 | Percentage of missing items described           | Percentage of missing items NOT described                          | NA                                        | NA                                       |
| Was there a description of how missing items were handled? | Described how missing items were handled        | Not described but it can be deduced how missing items were handled | Not clear how missing items were handled  |                                          |
| Was the sample size included in the analysis adequate?     | Adequate sample size ( $\geq 100$ per analysis) | Good sample size (50-99 per analysis)                              | Moderate sample size (30-49 per analysis) | Small sample size ( $< 30$ per analysis) |

|                                                                                                                        |                                                                                                                                                                                       |                                                                                                                     |                                                                                                                                                                 |                                                                                                                          |
|------------------------------------------------------------------------------------------------------------------------|---------------------------------------------------------------------------------------------------------------------------------------------------------------------------------------|---------------------------------------------------------------------------------------------------------------------|-----------------------------------------------------------------------------------------------------------------------------------------------------------------|--------------------------------------------------------------------------------------------------------------------------|
| Were hypotheses regarding correlations or mean differences formulated a priori (i.e. before data collection)?          | <b>hypotheses formulated a priori</b>                                                                                                                                                 | Minimal number of hypotheses formulate a priori                                                                     | Hypotheses vague or not formulated but possible to deduce what was expected                                                                                     | Unclear what was expected                                                                                                |
| Was the expected <i>direction</i> of correlations or mean differences included in the hypotheses?                      | <b>Expected direction of the correlations or differences stated- FABQ correlate positively with self-report</b>                                                                       | Expected direction of the correlations or differences NOT stated –                                                  |                                                                                                                                                                 |                                                                                                                          |
| Was the expected absolute or relative <i>magnitude</i> of correlations or mean differences included in the hypotheses? | Expected magnitude of the correlations or differences stated                                                                                                                          | <b>Expected magnitude of the correlations or differences NOT stated</b>                                             |                                                                                                                                                                 |                                                                                                                          |
| for convergent validity: Was an adequate description provided of the comparator instrument(s)?                         | <b>Adequate description of the constructs measured by the comparator instrument(s)</b>                                                                                                | Adequate description of most of the constructs measured by the comparator instrument(s)                             | Poor description of the constructs measured by the comparator instrument(s)                                                                                     | NO description of the constructs measured by the comparator instrument(s)                                                |
| for convergent validity: Were the measurement properties of the comparator instrument(s) adequately described?         | Adequate measurement properties of the comparator instrument(s) in a population similar to the study population- <b>KOS, SAS, ADLS used and the reliability/validity of KOS cited</b> | Adequate measurement properties of the comparator instrument(s) but not sure if these apply to the study population | <b>Some information on measurement properties (or a reference to a study on measurement properties) of the comparator instrument(s) in any study population</b> | No information on the measurement properties of the comparator instrument(s)<br>NOTE:<br>First time tested in this study |
| Were there any important flaws in the design or methods of the study?                                                  | No other important methodological flaws in the design or execution of the study                                                                                                       |                                                                                                                     | <b>Other minor methodological flaws in the design or execution of the study (e.g. only data presented on a comparison with an</b>                               | Other important methodological flaws in the design or execution of the study –                                           |

|                                                                               |                                         |                                                                                                                                               |                                                                                                             |                                             |
|-------------------------------------------------------------------------------|-----------------------------------------|-----------------------------------------------------------------------------------------------------------------------------------------------|-------------------------------------------------------------------------------------------------------------|---------------------------------------------|
|                                                                               |                                         |                                                                                                                                               | instrument that measures another construct)- they adapted FABQ to knee so metrics of FABQ not known in knee |                                             |
| Were design and statistical methods adequate for the hypotheses to be tested? | Statistical methods applied appropriate | Assumable that statistical methods were appropriate, e.g. Pearson correlations applied, but distribution of scores or mean (SD) not presented | Statistical methods applied NOT optimal                                                                     | Statistical methods applied NOT appropriate |

Svensson/Knee Sport Taumatol/2006

STEP1: Evaluated measurement properties in the article

| Check if present | Property                                | Location |
|------------------|-----------------------------------------|----------|
|                  | Reliability                             | Box A    |
|                  | Agreement/Measurement Error             | Box B    |
|                  | Hypothesis Testing / Construct validity | Box C    |
|                  | Criterion/Predictive Validity           | Box D    |
| ✓                | Responsiveness                          | Box E    |

## Step 2. Determining if a study meets the standards for good methodological quality

### E. Responsiveness n=59

| Design requirements                                           | Excellent                                | Good                                                               | Fair                                     | Poor                        |
|---------------------------------------------------------------|------------------------------------------|--------------------------------------------------------------------|------------------------------------------|-----------------------------|
| Was the percentage of missing items given?                    | Percentage of missing items described    | Percentage of missing items NOT described                          |                                          |                             |
| Was there a description of how missing items were handled?    | Described how missing items were handled | Not described but it can be deduced how missing items were handled | Not clear how missing items were handled |                             |
| Was the sample size included in the analysis adequate?        | Adequate sample size ( $\geq 100$ )      | Good sample size (50-99)                                           | Moderate sample size (30-49)             | Small sample size (<30)     |
| Was a longitudinal design with at least two measurement used? | Longitudinal design used                 |                                                                    |                                          | No longitudinal design used |
| Was the time interval stated?                                 | Time interval adequately described       |                                                                    |                                          | Time interval NOT described |

|                                                                                                                                                                      |                                                                                                        |                                                                                 |                                                                                      |                                                                                                                     |
|----------------------------------------------------------------------------------------------------------------------------------------------------------------------|--------------------------------------------------------------------------------------------------------|---------------------------------------------------------------------------------|--------------------------------------------------------------------------------------|---------------------------------------------------------------------------------------------------------------------|
| If anything occurred in the interim period (e.g. intervention, other relevant events), was it adequately described?                                                  | Anything that occurred during the interim period (e.g. treatment) adequately described                 | Assumable what occurred during the interim period                               | Unclear or NOT described what occurred during the interim period                     | If anything occurred in the interim period (e.g. intervention, other relevant events), was it adequately described? |
| Was a proportion of the patients changed (i.e. improvement or deterioration)?                                                                                        | Part of the patients were changed (evidence provided)- actually, all were improved at 2 year follow-up | NO evidence provided, but assumable that part of the patients were changed      | Unclear if part of the patients were changed                                         | Patients were NOT changed                                                                                           |
| <b>For constructs for which a gold standard was not available:</b>                                                                                                   |                                                                                                        |                                                                                 |                                                                                      |                                                                                                                     |
| Were hypotheses about changes in scores formulated a priori (i.e. before data collection)?                                                                           | Hypotheses formulated a priori                                                                         |                                                                                 | Hypotheses vague or not formulated but possible to deduce what was expected          | Unclear what was expected                                                                                           |
| Was the expected <i>direction</i> of correlations or mean differences of the change scores of HR-PRO instruments included in these hypotheses?                       | Expected direction of the correlations or differences stated                                           | Expected direction of the correlations or differences NOT stated                |                                                                                      |                                                                                                                     |
| Were the expected absolute or relative <i>magnitude</i> of correlations or mean differences of the change scores of HR-PRO instruments included in these hypotheses? | Expected magnitude of the correlations or differences stated                                           | Expected magnitude of the correlations or differences NOT stated                |                                                                                      |                                                                                                                     |
| Was an adequate description provided of the comparator instrument(s)?                                                                                                | Adequate description of the constructs measured by the comparator instrument(s)                        |                                                                                 | Poor description of the constructs measured by the comparator instrument(s)          | NO description of the constructs measured by the comparator instrument(s)                                           |
| Were the measurement properties of the comparator instrument(s) adequately                                                                                           | Adequate measurement properties of the comparator instrument(s) in a population                        | Adequate measurement properties of the comparator instrument(s) but not sure if | Some information on measurement properties (or a reference to a study on measurement | NO information on the measurement properties of the comparator instrument(s)                                        |

|                                                                                                                                       |                                                                                  |                                                                                                           |                                                                                                                                                                        |                                                                              |
|---------------------------------------------------------------------------------------------------------------------------------------|----------------------------------------------------------------------------------|-----------------------------------------------------------------------------------------------------------|------------------------------------------------------------------------------------------------------------------------------------------------------------------------|------------------------------------------------------------------------------|
| described?                                                                                                                            | similar to the study population                                                  | these apply to the study population                                                                       | properties) of the comparator instrument(s) in any study population                                                                                                    |                                                                              |
| Were there any important flaws in the design or methods of the study?                                                                 | No other important methodological flaws in the design or execution of the study  |                                                                                                           | Other minor methodological flaws in the design or execution of the study (e.g. only data presented on a comparison with an instrument that measures another construct) | Other important methodological flaws in the design or execution of the study |
| Were design and statistical methods adequate for the hypotheses to be tested?                                                         | Statistical methods applied appropriate                                          |                                                                                                           | Statistical methods applied NOT optimal                                                                                                                                | Statistical methods applied NOT appropriate                                  |
| <b>For constructs for which a gold standard was available:</b>                                                                        |                                                                                  |                                                                                                           |                                                                                                                                                                        |                                                                              |
| Can the criterion for change be considered as a reasonable gold standard?                                                             | Criterion used can be considered an adequate 'gold standard' (evidence provided) | No evidence provided, but assumable that the criterion used can be considered an adequate 'gold standard' | Unclear whether the criterion used can be considered an adequate 'gold standard'                                                                                       | Criterion used can NOT be considered an adequate 'gold standard'             |
| Were there any important flaws in the design or methods of the study?                                                                 | No other important methodological flaws in the design or execution of the study  |                                                                                                           | Other minor methodological flaws in the design or execution of the study                                                                                               | Other important methodological flaws in the design or execution of the study |
| for continuous scores: Were correlations between change scores, or the area under the Receiver Operator Curve (ROC) curve calculated? | Correlations or Area under the ROC Curve (AUC) calculated                        |                                                                                                           |                                                                                                                                                                        | Correlations or AUC NOT calculated                                           |
| for dichotomous scales: Were sensitivity and specificity (changed versus not changed) determined?                                     | Sensitivity and specificity calculated                                           |                                                                                                           |                                                                                                                                                                        | Sensitivity and specificity NOT calculated                                   |

STEP1: Evaluated measurement properties in the article

| Check if present | Property                                | Location     |
|------------------|-----------------------------------------|--------------|
|                  | Reliability                             | Box A        |
|                  | Agreement/Measurement Error             | Box B        |
| ✓                | Hypothesis Testing / Construct validity | <b>Box C</b> |
|                  | Criterion/Predictive Validity           | Box D        |
|                  | Responsiveness                          | Box E        |

**Step 2. Determining if a study meets the standards for good methodological quality**

**C. Hypothesis Testing / Construct Validity n=48**

| Design requirements                                                                                                    | Excellent                                                     | Good                                                               | Fair                                                                        | Poor                                             |
|------------------------------------------------------------------------------------------------------------------------|---------------------------------------------------------------|--------------------------------------------------------------------|-----------------------------------------------------------------------------|--------------------------------------------------|
| Was the percentage of missing items given?                                                                             | Percentage of missing items described                         | Percentage of missing items NOT described                          | NA                                                                          | NA                                               |
| Was there a description of how missing items were handled?                                                             | Described how missing items were handled                      | Not described but it can be deduced how missing items were handled | Not clear how missing items were handled                                    |                                                  |
| Was the sample size included in the analysis adequate?                                                                 | Adequate sample size ( $\geq 100$ per analysis)               | Good sample size (50-99 per analysis)                              | Moderate sample size (30-49 per analysis)                                   | Small sample size ( $< 30$ per analysis)         |
| Were hypotheses regarding correlations or mean differences formulated a priori (i.e. before data collection)?          | hypotheses formulated a priori                                | Minimal number of hypotheses formulate a priori                    | Hypotheses vague or not formulated but possible to deduce what was expected | Unclear what was expected                        |
| Was the expected <i>direction</i> of correlations or mean differences included in the hypotheses?                      | Expected direction of the correlations or differences stated- | Expected direction of the correlations or differences NOT stated - |                                                                             |                                                  |
| Was the expected absolute or relative <i>magnitude</i> of correlations or mean differences included in the hypotheses? | Expected magnitude of the correlations or differences stated  | Expected magnitude of the correlations or differences NOT stated   |                                                                             |                                                  |
| for convergent validity: Was an adequate                                                                               | Adequate description of the constructs                        | Adequate description of most of the                                | Poor description of the constructs measured by the                          | NO description of the constructs measured by the |

|                                                                                                                |                                                                                                                                                                     |                                                                                                                                               |                                                                                                                                                                        |                                                                                                                       |
|----------------------------------------------------------------------------------------------------------------|---------------------------------------------------------------------------------------------------------------------------------------------------------------------|-----------------------------------------------------------------------------------------------------------------------------------------------|------------------------------------------------------------------------------------------------------------------------------------------------------------------------|-----------------------------------------------------------------------------------------------------------------------|
| description provided of the comparator instrument(s)?                                                          | measured by the comparator instrument(s)                                                                                                                            | constructs measured by the comparator instrument(s)                                                                                           | comparator instrument(s)                                                                                                                                               | comparator instrument(s)                                                                                              |
| for convergent validity: Were the measurement properties of the comparator instrument(s) adequately described? | Adequate measurement properties of the comparator instrument(s) in a population similar to the study population- KOS, SAS, ADLS used and the rel/valid of KOS cited | Adequate measurement properties of the comparator instrument(s) but not sure if these apply to the study population                           | Some information on measurement properties (or a reference to a study on measurement properties) of the comparator instrument(s) in any study population               | No information on the measurement properties of the comparator instrument(s)<br>NOTE: First time tested in this study |
| Were there any important flaws in the design or methods of the study?                                          | No other important methodological flaws in the design or execution of the study                                                                                     |                                                                                                                                               | Other minor methodological flaws in the design or execution of the study (e.g. only data presented on a comparison with an instrument that measures another construct) | Other important methodological flaws in the design or execution of the study –                                        |
| Were design and statistical methods adequate for the hypotheses to be tested?                                  | Statistical methods applied appropriate                                                                                                                             | Assumable that statistical methods were appropriate, e.g. Pearson correlations applied, but distribution of scores or mean (SD) not presented | Statistical methods applied NOT optimal- correlation coefficients would be more appropriate                                                                            | Statistical methods applied NOT appropriate                                                                           |

Witvrouw/Scand J Med Sci Sports/2002

STEP1: Evaluated measurement properties in the article

| Check if present | Property                                | Location |
|------------------|-----------------------------------------|----------|
| ✓                | Reliability                             | Box A    |
|                  | Agreement/Measurement Error             | Box B    |
| ✓                | Hypothesis Testing / Construct validity | Box C    |
|                  | Criterion/Predictive Validity           | Box D    |
|                  | Responsiveness                          | Box E    |

## Step 2. Determining if a study meets the standards for good methodological quality

### A. Reliability n=25 for reliability

| Design requirements                                   | Excellent                      | Good                               | Fair | Poor |
|-------------------------------------------------------|--------------------------------|------------------------------------|------|------|
| Was the percentage of missing subjects given?<br>none | Percentage of missing subjects | Percentage of missing subjects NOT |      |      |

|                                                                                                                |                                                                                        |                                                                                                                                                                                      |                                                                                                                                                          |                                                                              |
|----------------------------------------------------------------------------------------------------------------|----------------------------------------------------------------------------------------|--------------------------------------------------------------------------------------------------------------------------------------------------------------------------------------|----------------------------------------------------------------------------------------------------------------------------------------------------------|------------------------------------------------------------------------------|
|                                                                                                                | <b>described</b>                                                                       | described                                                                                                                                                                            |                                                                                                                                                          |                                                                              |
| Was there a description of how missing subjects were handled?                                                  | Described how missing subjects were handled                                            | <b>Not described but it can be deduced how missing subjects were handled</b>                                                                                                         | Not clear how missing subjects were handled                                                                                                              |                                                                              |
| Was the sample size included in the analysis adequate?                                                         | Adequate sample size ( $\geq 100$ )                                                    | Good sample size (50-99)                                                                                                                                                             | Moderate sample size (30-49)                                                                                                                             | <b>Small sample size (&lt;30)</b>                                            |
| Were at least two measurements available?<br>Intra and inter <b>intra only</b>                                 | At least two measurements                                                              |                                                                                                                                                                                      |                                                                                                                                                          | <b>Only one measurement</b>                                                  |
| Were the administrations independent? Intra                                                                    | <b>Independent measurements</b>                                                        | Assumable that the measurements were independent                                                                                                                                     | Doubtful whether the measurements were independent                                                                                                       | Measurements NOT independent                                                 |
| Was the time interval stated?<br>Intra                                                                         | <b>Time interval stated</b>                                                            |                                                                                                                                                                                      | Time interval NOT stated                                                                                                                                 |                                                                              |
| Were patients stable in the interim period on the construct to be measured?<br>Intra                           | Patients were stable (evidence provided)                                               | <b>Assumable that patients were stable</b>                                                                                                                                           | Unclear if patients were stable                                                                                                                          | Patients were NOT stable                                                     |
| Was the time interval appropriate?<br>Intra                                                                    | <b>Time interval appropriate</b>                                                       |                                                                                                                                                                                      | Doubtful whether time interval was appropriate                                                                                                           | Time interval NOT appropriate                                                |
| Were the test conditions similar for both measurements? e.g. type of administration, environment, instructions | Test conditions were similar (evidence provided)                                       | Assumable that test conditions were similar                                                                                                                                          | <b>Unclear if test conditions were similar</b>                                                                                                           | Test conditions were NOT similar                                             |
| Were there any important flaws in the design or methods of the study?<br>Intra                                 | <b>No other important methodological flaws in the design or execution of the study</b> |                                                                                                                                                                                      | Other minor methodological flaws in the design or execution of the study                                                                                 | Other important methodological flaws in the design or execution of the study |
| for continuous scores: Was an intraclass correlation coefficient (ICC) calculated?                             | ICC calculated and model or formula of the ICC is described                            | <b>ICC calculated but model or formula of the ICC not described</b> or not optimal. Pearson or Spearman correlation coefficient calculated with evidence provided that no systematic | Pearson or Spearman correlation coefficient calculated WITHOUT evidence provided that no systematic change has occurred or WITH evidence that systematic | <del>No ICC or Pearson or Spearman correlations calculated</del>             |



|                                                                                |                            |                                |                                       |                                                                |
|--------------------------------------------------------------------------------|----------------------------|--------------------------------|---------------------------------------|----------------------------------------------------------------|
|                                                                                |                            | change has occurred            | change has occurred                   |                                                                |
| For dichotomous/nominal/ordinal scores: Was kappa calculated?                  | Kappa calculated           |                                |                                       | Only percentage agreement calculated                           |
| for ordinal scores: Was a weighted kappa calculated?                           | Weighted Kappa calculated  |                                | Unweighted Kappa calculated           | Only percentage agreement calculated – actually TEM calculated |
| for ordinal scores: Was the weighting scheme described? e.g. linear, quadratic | Weighting scheme described | Weighting scheme NOT described | With TEM- not sure how to answer this |                                                                |

### C. Hypothesis Testing / Construct Validity n=30

| Design requirements                                                                                           | Excellent                                                       | Good                                                               | Fair                                                                        | Poor                                     |
|---------------------------------------------------------------------------------------------------------------|-----------------------------------------------------------------|--------------------------------------------------------------------|-----------------------------------------------------------------------------|------------------------------------------|
| Was the percentage of missing items given?<br>none                                                            | Percentage of missing items described                           | Percentage of missing items NOT described                          | NA                                                                          | NA                                       |
| Was there a description of how missing items were handled?                                                    | Described how missing items were handled- all in final analysis | Not described but it can be deduced how missing items were handled | Not clear how missing items were handled                                    |                                          |
| Was the sample size included in the analysis adequate?                                                        | Adequate sample size ( $\geq 100$ per analysis)                 | Good sample size (50-99 per analysis)                              | Moderate sample size (30-49 per analysis)                                   | Small sample size ( $< 30$ per analysis) |
| Were hypotheses regarding correlations or mean differences formulated a priori (i.e. before data collection)? | hypotheses formulated a priori                                  | Minimal number of hypotheses formulate a priori                    | Hypotheses vague or not formulated but possible to deduce what was expected | Unclear what was expected                |
| Was the expected direction of correlations or mean differences included in the hypotheses?                    | Expected direction of the correlations or differences stated-   | Expected direction of the correlations or differences NOT stated - |                                                                             |                                          |
| Was the expected absolute or relative magnitude of correlations or                                            | Expected magnitude of the correlations or differences stated    | Expected magnitude of the correlations or differences NOT stated   |                                                                             |                                          |

|                                                                                                                |                                                                                                                  |                                                                                                                                               |                                                                                                                                                                        |                                                                                                                          |
|----------------------------------------------------------------------------------------------------------------|------------------------------------------------------------------------------------------------------------------|-----------------------------------------------------------------------------------------------------------------------------------------------|------------------------------------------------------------------------------------------------------------------------------------------------------------------------|--------------------------------------------------------------------------------------------------------------------------|
| mean differences included in the hypotheses?                                                                   |                                                                                                                  |                                                                                                                                               |                                                                                                                                                                        |                                                                                                                          |
| for convergent validity: Was an adequate description provided of the comparator instrument(s)?                 | Adequate description of the constructs measured by the comparator instrument(s)                                  | Adequate description of most of the constructs measured by the comparator instrument(s)                                                       | Poor description of the constructs measured by the comparator instrument(s)                                                                                            | NO description of the constructs measured by the comparator instrument(s)                                                |
| for convergent validity: Were the measurement properties of the comparator instrument(s) adequately described? | Adequate measurement properties of the comparator instrument(s) in a population similar to the study population- | Adequate measurement properties of the comparator instrument(s) but not sure if these apply to the study population                           | Some information on measurement properties (or a reference to a study on measurement properties) of the comparator instrument(s) in any study population               | No information on the measurement properties of the comparator instrument(s)<br>NOTE:<br>First time tested in this study |
| Were there any important flaws in the design or methods of the study?                                          | No other important methodological flaws in the design or execution of the study                                  |                                                                                                                                               | Other minor methodological flaws in the design or execution of the study (e.g. only data presented on a comparison with an instrument that measures another construct) | Other important methodological flaws in the design or execution of the study -                                           |
| Were design and statistical methods adequate for the hypotheses to be tested?                                  | Statistical methods applied appropriate                                                                          | Assumable that statistical methods were appropriate, e.g. Pearson correlations applied, but distribution of scores or mean (SD) not presented | Statistical methods applied NOT optimal- correlation coefficients would be more appropriate                                                                            | Statistical methods applied NOT appropriate                                                                              |

Zouita/Annals of Phys & Rehab Medicine/2009

STEP1: Evaluated measurement properties in the article

| Check if present | Property                                | Location |
|------------------|-----------------------------------------|----------|
|                  | Reliability                             | Box A    |
|                  | Agreement/Measurement Error             | Box B    |
| ✓                | Hypothesis Testing / Construct validity | Box C    |
|                  | Criterion/Predictive Validity           | Box D    |
|                  | Responsiveness                          | Box E    |

**Step 2. Determining if a study meets the standards for good methodological quality**

**C. Hypothesis Testing / Construct Validity n=46**

| Design requirements                                                                                                    | Excellent                                                                                                           | Good                                                                                    | Fair                                                                        | Poor                                                                      |
|------------------------------------------------------------------------------------------------------------------------|---------------------------------------------------------------------------------------------------------------------|-----------------------------------------------------------------------------------------|-----------------------------------------------------------------------------|---------------------------------------------------------------------------|
| Was the percentage of missing items given?                                                                             | Percentage of missing items described                                                                               | Percentage of missing items NOT described                                               | NA                                                                          | NA                                                                        |
| Was there a description of how missing items were handled?                                                             | Described how missing items were handled- all in final analysis                                                     | Not described but it can be deduced how missing items were handled                      | Not clear how missing items were handled                                    |                                                                           |
| Was the sample size included in the analysis adequate?                                                                 | Adequate sample size ( $\geq 100$ per analysis)                                                                     | Good sample size (50-99 per analysis)                                                   | Moderate sample size (30-49 per analysis)                                   | Small sample size ( $< 30$ per analysis)                                  |
| Were hypotheses regarding correlations or mean differences formulated a priori (i.e. before data collection)?          | hypotheses formulated a priori                                                                                      | Minimal number of hypotheses formulate a priori                                         | Hypotheses vague or not formulated but possible to deduce what was expected | Unclear what was expected                                                 |
| Was the expected <i>direction</i> of correlations or mean differences included in the hypotheses?                      | Expected direction of the correlations or differences stated-                                                       | Expected direction of the correlations or differences NOT stated –                      |                                                                             |                                                                           |
| Was the expected absolute or relative <i>magnitude</i> of correlations or mean differences included in the hypotheses? | Expected magnitude of the correlations or differences stated                                                        | Expected magnitude of the correlations or differences NOT stated                        |                                                                             |                                                                           |
| for convergent validity: Was an adequate description provided of the comparator instrument(s)?                         | Adequate description of the constructs measured by the comparator instrument(s) – same test in a healthy population | Adequate description of most of the constructs measured by the comparator instrument(s) | Poor description of the constructs measured by the comparator instrument(s) | NO description of the constructs measured by the comparator instrument(s) |
| for convergent validity: Were the measurement properties of the comparator                                             | Adequate measurement properties of the comparator instrument(s) in a                                                | Adequate measurement properties of the comparator instrument(s)                         | Some information on measurement properties (or a reference to a study on    | No information on the measurement properties of the comparator            |

|                                                                               |                                                                                 |                                                                                                                                               |                                                                                                                                                                        |                                                                                |
|-------------------------------------------------------------------------------|---------------------------------------------------------------------------------|-----------------------------------------------------------------------------------------------------------------------------------------------|------------------------------------------------------------------------------------------------------------------------------------------------------------------------|--------------------------------------------------------------------------------|
| instrument(s) adequately described?                                           | population similar to the study population-                                     | but not sure if these apply to the study population                                                                                           | measurement properties) of the comparator instrument(s) in any study population                                                                                        | instrument(s)<br>NOTE:<br>First time tested in this study                      |
| Were there any important flaws in the design or methods of the study?         | No other important methodological flaws in the design or execution of the study |                                                                                                                                               | Other minor methodological flaws in the design or execution of the study (e.g. only data presented on a comparison with an instrument that measures another construct) | Other important methodological flaws in the design or execution of the study - |
| Were design and statistical methods adequate for the hypotheses to be tested? | Statistical methods applied appropriate                                         | Assumable that statistical methods were appropriate, e.g. Pearson correlations applied, but distribution of scores or mean (SD) not presented | Statistical methods applied NOT optimal- correlation coefficients would be more appropriate                                                                            | Statistical methods applied NOT appropriate                                    |

Barber/CORR/1990

STEP1: Evaluated measurement properties in the article

| Check if present | Property                                | Location |
|------------------|-----------------------------------------|----------|
|                  | Reliability                             | Box A    |
|                  | Agreement/Measurement Error             | Box B    |
| ✓                | Hypothesis Testing / Construct validity | Box C    |
|                  | Criterion/Predictive Validity           | Box D    |
|                  | Responsiveness                          | Box E    |

**Step 2. Determining if a study meets the standards for good methodological quality**

**C. Hypothesis Testing / Construct Validity n=93**

| Design requirements                                        | Excellent                                                       | Good                                                               | Fair                                     | Poor |
|------------------------------------------------------------|-----------------------------------------------------------------|--------------------------------------------------------------------|------------------------------------------|------|
| Was the percentage of missing items given?<br>none         | Percentage of missing items described                           | Percentage of missing items NOT described                          | NA                                       | NA   |
| Was there a description of how missing items were handled? | Described how missing items were handled- all in final analysis | Not described but it can be deduced how missing items were handled | Not clear how missing items were handled |      |

|                                                                                                                 |                                                                                                                     |                                                                                                                     |                                                                                                                                                          |                                                                                                                          |
|-----------------------------------------------------------------------------------------------------------------|---------------------------------------------------------------------------------------------------------------------|---------------------------------------------------------------------------------------------------------------------|----------------------------------------------------------------------------------------------------------------------------------------------------------|--------------------------------------------------------------------------------------------------------------------------|
| Was the sample size included in the analysis adequate?                                                          | Adequate sample size ( $\geq 100$ per analysis)                                                                     | Good sample size (50-99 per analysis)                                                                               | Moderate sample size (30-49 per analysis)                                                                                                                | Small sample size ( $< 30$ per analysis)                                                                                 |
| Were hypotheses regarding correlations or mean differences formulated a priori (i.e. before data collection)?   | hypotheses formulated a priori                                                                                      | Minimal number of hypotheses formulate a priori                                                                     | Hypotheses vague or not formulated but possible to deduce what was expected                                                                              | Unclear what was expected                                                                                                |
| Was the expected direction of correlations or mean differences included in the hypotheses?                      | Expected direction of the correlations or differences stated-                                                       | Expected direction of the correlations or differences NOT stated -                                                  |                                                                                                                                                          |                                                                                                                          |
| Was the expected absolute or relative magnitude of correlations or mean differences included in the hypotheses? | Expected magnitude of the correlations or differences stated                                                        | Expected magnitude of the correlations or differences NOT stated                                                    |                                                                                                                                                          |                                                                                                                          |
| for convergent validity: Was an adequate description provided of the comparator instrument(s)?                  | Adequate description of the constructs measured by the comparator instrument(s) – same test in a healthy population | Adequate description of most of the constructs measured by the comparator instrument(s)                             | Poor description of the constructs measured by the comparator instrument(s)                                                                              | NO description of the constructs measured by the comparator instrument(s)                                                |
| for convergent validity: Were the measurement properties of the comparator instrument(s) adequately described?  | Adequate measurement properties of the comparator instrument(s) in a population similar to the study population-    | Adequate measurement properties of the comparator instrument(s) but not sure if these apply to the study population | Some information on measurement properties (or a reference to a study on measurement properties) of the comparator instrument(s) in any study population | No information on the measurement properties of the comparator instrument(s)<br>NOTE:<br>First time tested in this study |
| Were there any important flaws in the design or methods of the study?                                           | No other important methodological flaws in the design or execution of the study                                     |                                                                                                                     | Other minor methodological flaws in the design or execution of the study (e.g. only data presented on a comparison with an instrument that               | Other important methodological flaws in the design or execution of the study -                                           |

|                                                                               |                                                |                                                                                                                                               |                                                                                             |                                             |
|-------------------------------------------------------------------------------|------------------------------------------------|-----------------------------------------------------------------------------------------------------------------------------------------------|---------------------------------------------------------------------------------------------|---------------------------------------------|
|                                                                               |                                                |                                                                                                                                               | measures another construct)                                                                 |                                             |
| Were design and statistical methods adequate for the hypotheses to be tested? | <b>Statistical methods applied appropriate</b> | Assumable that statistical methods were appropriate, e.g. Pearson correlations applied, but distribution of scores or mean (SD) not presented | Statistical methods applied NOT optimal- correlation coefficients would be more appropriate | Statistical methods applied NOT appropriate |

Brosky/JOSPT/1999

**STEP1: Evaluated measurement properties in the article**

| Check if present | Property                                | Location |
|------------------|-----------------------------------------|----------|
| ✓                | Reliability                             | Box A    |
|                  | Agreement/Measurement Error             | Box B    |
|                  | Hypothesis Testing / Construct validity | Box C    |
|                  | Criterion/Predictive Validity           | Box D    |
|                  | Responsiveness                          | Box E    |

**Step 2. Determining if a study meets the standards for good methodological quality**

**A. Reliability n=15 for reliability**

| Design requirements                                                                  | Excellent                                       | Good                                                                         | Fair                                               | Poor                                   |
|--------------------------------------------------------------------------------------|-------------------------------------------------|------------------------------------------------------------------------------|----------------------------------------------------|----------------------------------------|
| Was the percentage of missing subjects given?<br><b>none</b>                         | <b>Percentage of missing subjects described</b> | Percentage of missing subjects NOT described                                 |                                                    |                                        |
| Was there a description of how missing subjects were handled?<br><b>none</b>         | Described how missing subjects were handled     | <b>Not described but it can be deduced how missing subjects were handled</b> | Not clear how missing subjects were handled        |                                        |
| Was the sample size included in the analysis adequate?                               | Adequate sample size ( $\geq 100$ )             | Good sample size (50-99)                                                     | Moderate sample size (30-49)                       | <b>Small sample size (&lt;30) n=15</b> |
| Were at least two measurements available?<br>Intra and inter <b>intra only</b>       | At least two measurements                       |                                                                              |                                                    | <b>Only one measurement</b>            |
| Were the administrations independent? <b>Intra</b>                                   | <b>Independent measurements</b>                 | Assumable that the measurements were independent                             | Doubtful whether the measurements were independent | Measurements NOT independent           |
| Was the time interval stated?<br>Intra                                               | <b>Time interval stated</b>                     |                                                                              | Time interval NOT stated                           |                                        |
| Were patients stable in the interim period on the construct to be measured?<br>Intra | Patients were stable (evidence provided)        | <b>Assumable that patients were stable</b>                                   | Unclear if patients were stable                    | Patients were NOT stable               |

|                                                                                                                |                                                                                 |                                                                                                                                                                                                   |                                                                                                                                                                              |                                                                              |
|----------------------------------------------------------------------------------------------------------------|---------------------------------------------------------------------------------|---------------------------------------------------------------------------------------------------------------------------------------------------------------------------------------------------|------------------------------------------------------------------------------------------------------------------------------------------------------------------------------|------------------------------------------------------------------------------|
| Was the time interval appropriate?<br>Intra                                                                    | Time interval appropriate                                                       |                                                                                                                                                                                                   | Doubtful whether time interval was appropriate                                                                                                                               | Time interval NOT appropriate                                                |
| Were the test conditions similar for both measurements? e.g. type of administration, environment, instructions | Test conditions were similar (evidence provided)                                | Assumable that test conditions were similar                                                                                                                                                       | Unclear if test conditions were similar                                                                                                                                      | Test conditions were NOT similar                                             |
| Were there any important flaws in the design or methods of the study?<br>Intra                                 | No other important methodological flaws in the design or execution of the study |                                                                                                                                                                                                   | Other minor methodological flaws in the design or execution of the study                                                                                                     | Other important methodological flaws in the design or execution of the study |
| for continuous scores: Was an intraclass correlation coefficient (ICC) calculated?                             | ICC calculated and model or formula of the ICC is described                     | ICC calculated but model or formula of the ICC not described or not optimal. Pearson or Spearman correlation coefficient calculated with evidence provided that no systematic change has occurred | Pearson or Spearman correlation coefficient calculated WITHOUT evidence provided that no systematic change has occurred or WITH evidence that systematic change has occurred | No ICC or Pearson or Spearman correlations calculated                        |
| For dichotomous/nominal/ordinal scores: Was kappa calculated?                                                  | Kappa calculated                                                                |                                                                                                                                                                                                   |                                                                                                                                                                              | Only percentage agreement calculated                                         |
| for ordinal scores: Was a weighted kappa calculated?                                                           | Weighted Kappa calculated                                                       |                                                                                                                                                                                                   | Unweighted Kappa calculated                                                                                                                                                  | Only percentage agreement calculated – actually TEM calculated               |
| for ordinal scores: Was the weighting scheme described? e.g. linear, quadratic                                 | Weighting scheme described                                                      | Weighting scheme NOT described                                                                                                                                                                    | With TEM – not sure how to answer this                                                                                                                                       |                                                                              |

Grindem/Am J Sports Med/2011

**STEP1: Evaluated measurement properties in the article**

| Check if present | Property                                | Location |
|------------------|-----------------------------------------|----------|
|                  | Reliability                             | Box A    |
|                  | Agreement/Measurement Error             | Box B    |
|                  | Hypothesis Testing / Construct validity | Box C    |

|   |                               |       |
|---|-------------------------------|-------|
| ✓ | Criterion/Predictive Validity | Box D |
|   | Responsiveness                | Box E |

**Step 2. Determining if a study meets the standards for good methodological quality**

**D. Criterion/predictive Validity n=91 but 10 were lost in follow-up so n=81**

| Design requirements                                                                                  | Excellent                                                                                                        | Good                                                                                                      | Fair                                                                              | Poor                                                                  |
|------------------------------------------------------------------------------------------------------|------------------------------------------------------------------------------------------------------------------|-----------------------------------------------------------------------------------------------------------|-----------------------------------------------------------------------------------|-----------------------------------------------------------------------|
| Was the percentage of missing items given?                                                           | Percentage of missing items described                                                                            | Percentage of missing items NOT described                                                                 | NA                                                                                | NA                                                                    |
| Was there a description of how missing items were handled?                                           | Described how missing items were handled                                                                         | Not described but it can be deduced how missing items were handled-                                       | Not clear how missing items were handled<br>Not clear if there were missing items |                                                                       |
| Was the sample size included in the analysis adequate?                                               | Adequate sample size (≥100)                                                                                      | Good sample size (50-99)                                                                                  | Moderate sample size (30-49)                                                      | Small sample size (<30)                                               |
| Can the criterion used or employed be considered as a reasonable 'gold standard'?                    | Criterion used can be considered an adequate 'gold standard' (evidence provided)                                 | No evidence provided, but assumable that the criterion used can be considered an adequate 'gold standard' | Unclear whether the criterion used can be considered an adequate 'gold standard'  | Criterion used can NOT be considered an adequate 'gold standard'      |
| Were there any important flaws in the design or methods of the study?                                | No other important methodological flaws in the design or execution of the study                                  | Other minor methodological flaws in the design or execution of the study                                  | Other important methodological flaws in the design or execution of the study      | Were there any important flaws in the design or methods of the study? |
| for continuous scores: Were correlations, or the area under the receiver operating curve calculated? | Correlations or AUC calculated-<br>Single hop is only test correlated with self-reported IKDC function at 1 year |                                                                                                           |                                                                                   | Correlations or AUC NOT calculated                                    |
| for dichotomous scores: Were sensitivity and specificity determined?                                 | Sensitivity and specificity calculated<br>Single hop 71;71;<br>LR+ 2.52<br>LR- 0.40                              |                                                                                                           |                                                                                   | Sensitivity and specificity NOT calculated                            |

Logerstedt/Am J Sports Med/2012

**STEP1: Evaluated measurement properties in the article**

| Check if present | Property                       | Location |
|------------------|--------------------------------|----------|
|                  | Reliability                    | Box A    |
|                  | Agreement/Masurement Error     | Box B    |
|                  | Hypothesis Testing / Construct | Box C    |



|   |                               |       |
|---|-------------------------------|-------|
|   | validity                      |       |
| ✓ | Criterion/Predictive Validity | Box D |
|   | Responsiveness                | Box E |

**Step 2. Determining if a study meets the standards for good methodological quality**

**D. Criterion/predictive Validity pre-op to 1 year n=79; 6 mos to 1 year n=85**

| Design requirements                                                                                  | Excellent                                                                                                                                     | Good                                                                                                      | Fair                                                                              | Poor                                                                  |
|------------------------------------------------------------------------------------------------------|-----------------------------------------------------------------------------------------------------------------------------------------------|-----------------------------------------------------------------------------------------------------------|-----------------------------------------------------------------------------------|-----------------------------------------------------------------------|
| Was the percentage of missing items given?                                                           | Percentage of missing items described                                                                                                         | Percentage of missing items NOT described                                                                 | NA                                                                                | NA                                                                    |
| Was there a description of how missing items were handled?                                           | Described how missing items were handled                                                                                                      | Not described but it can be deduced how missing items were handled-                                       | Not clear how missing items were handled<br>Not clear if there were missing items |                                                                       |
| Was the sample size included in the analysis adequate?                                               | Adequate sample size ( $\geq 100$ )                                                                                                           | Good sample size (50-99)                                                                                  | Moderate sample size (30-49)                                                      | Small sample size (<30)                                               |
| Can the criterion used or employed be considered as a reasonable 'gold standard'?                    | Criterion used can be considered an adequate 'gold standard' (evidence provided)                                                              | No evidence provided, but assumable that the criterion used can be considered an adequate 'gold standard' | Unclear whether the criterion used can be considered an adequate 'gold standard'  | Criterion used can NOT be considered an adequate 'gold standard'      |
| Were there any important flaws in the design or methods of the study?                                | No other important methodological flaws in the design or execution of the study                                                               | Other minor methodological flaws in the design or execution of the study                                  | Other important methodological flaws in the design or execution of the study      | Were there any important flaws in the design or methods of the study? |
| for continuous scores: Were correlations, or the area under the receiver operating curve calculated? | Correlations or AUC calculated-<br>Single hop is only test correlated with self-reported IKDC function at 1 year                              |                                                                                                           |                                                                                   | Correlations or AUC NOT calculated                                    |
| for dichotomous scores: Were sensitivity and specificity determined?                                 | Sensitivity and specificity calculated<br>6m timed hop (87.7% LSI) 53;90; LR+ 5.14<br>LR- 0.40<br>Crossover hop (94.9% LSI) 88;47<br>LR- 0.25 |                                                                                                           |                                                                                   | Sensitivity and specificity NOT calculated                            |

**STEP1: Evaluated measurement properties in the article**

| Check if present | Property                                | Location |
|------------------|-----------------------------------------|----------|
|                  | Reliability                             | Box A    |
|                  | Agreement/Measurement Error             | Box B    |
| ✓                | Hypothesis Testing / Construct validity | Box C    |
|                  | Criterion/Predictive Validity           | Box D    |
|                  | Responsiveness                          | Box E    |

**Step 2. Determining if a study meets the standards for good methodological quality**

**C. Hypothesis Testing / Construct Validity n= 101**

| Design requirements                                                                                           | Excellent                                                        | Good                                                                      | Fair                                                                               | Poor                                 |
|---------------------------------------------------------------------------------------------------------------|------------------------------------------------------------------|---------------------------------------------------------------------------|------------------------------------------------------------------------------------|--------------------------------------|
| Was the percentage of missing items given?<br><b>none</b>                                                     | Percentage of missing items described                            | <b>Percentage of missing items NOT described</b>                          | NA                                                                                 | NA                                   |
| Was there a description of how missing items were handled? <b>none</b>                                        | Described how missing items were handled- all in final analysis  | <b>Not described but it can be deduced how missing items were handled</b> | Not clear how missing items were handled                                           |                                      |
| Was the sample size included in the analysis adequate?                                                        | <b>Adequate sample size (<math>\geq 100</math> per analysis)</b> | Good sample size (50-99 per analysis)                                     | Moderate sample size (30-49 per analysis)                                          | Small sample size (<30 per analysis) |
| Were hypotheses regarding correlations or mean differences formulated a priori (i.e. before data collection)? | hypotheses formulated a priori                                   | Minimal number of hypotheses formulate a priori                           | <b>Hypotheses vague or not formulated but possible to deduce what was expected</b> | Unclear what was expected            |
| Was the expected <i>direction</i> of correlations or mean differences included in the hypotheses?             | Expected direction of the correlations or differences stated-    | <b>Expected direction of the correlations or differences NOT stated -</b> |                                                                                    |                                      |
| Was the expected absolute or relative <i>magnitude</i> of correlations or mean differences included in the    | Expected magnitude of the correlations or differences stated     | <b>Expected magnitude of the correlations or differences NOT stated</b>   |                                                                                    |                                      |

|                                                                                                                |                                                                                                                     |                                                                                                                                               |                                                                                                                                                                        |                                                                                                                       |
|----------------------------------------------------------------------------------------------------------------|---------------------------------------------------------------------------------------------------------------------|-----------------------------------------------------------------------------------------------------------------------------------------------|------------------------------------------------------------------------------------------------------------------------------------------------------------------------|-----------------------------------------------------------------------------------------------------------------------|
| hypotheses?                                                                                                    |                                                                                                                     |                                                                                                                                               |                                                                                                                                                                        |                                                                                                                       |
| for convergent validity: Was an adequate description provided of the comparator instrument(s)?                 | Adequate description of the constructs measured by the comparator instrument(s) – same test in a healthy population | Adequate description of most of the constructs measured by the comparator instrument(s)                                                       | Poor description of the constructs measured by the comparator instrument(s)                                                                                            | NO description of the constructs measured by the comparator instrument(s)                                             |
| for convergent validity: Were the measurement properties of the comparator instrument(s) adequately described? | Adequate measurement properties of the comparator instrument(s) in a population similar to the study population-    | Adequate measurement properties of the comparator instrument(s) but not sure if these apply to the study population                           | Some information on measurement properties (or a reference to a study on measurement properties) of the comparator instrument(s) in any study population               | No information on the measurement properties of the comparator instrument(s)<br>NOTE: First time tested in this study |
| Were there any important flaws in the design or methods of the study?                                          | No other important methodological flaws in the design or execution of the study                                     |                                                                                                                                               | Other minor methodological flaws in the design or execution of the study (e.g. only data presented on a comparison with an instrument that measures another construct) | Other important methodological flaws in the design or execution of the study –                                        |
| Were design and statistical methods adequate for the hypotheses to be tested?                                  | Statistical methods applied appropriate                                                                             | Assumable that statistical methods were appropriate, e.g. Pearson correlations applied, but distribution of scores or mean (SD) not presented | Statistical methods applied NOT optimal- correlation coefficients would be more appropriate                                                                            | Statistical methods applied NOT appropriate                                                                           |

Wilk/JOSPT/1994

**STEP1: Evaluated measurement properties in the article**

| Check if present | Property                                | Location |
|------------------|-----------------------------------------|----------|
|                  | Reliability                             | Box A    |
|                  | Agreement/Measurement Error             | Box B    |
| ✓                | Hypothesis Testing / Construct validity | Box C    |
|                  | Criterion/Predictive Validity           | Box D    |
|                  | Responsiveness                          | Box E    |

**Step 2. Determining if a study meets the standards for good methodological quality**  
**C. Hypothesis Testing / Construct Validity n= 50**

| Design requirements                                                                                                    | Excellent                                                                       | Good                                                                                    | Fair                                                                                 | Poor                                                                      |
|------------------------------------------------------------------------------------------------------------------------|---------------------------------------------------------------------------------|-----------------------------------------------------------------------------------------|--------------------------------------------------------------------------------------|---------------------------------------------------------------------------|
| Was the percentage of missing items given?                                                                             | Percentage of missing items described                                           | Percentage of missing items NOT described                                               | NA                                                                                   | NA                                                                        |
| Was there a description of how missing items were handled?                                                             | Described how missing items were handled- all in final analysis                 | Not described but it can be deduced how missing items were handled                      | Not clear how missing items were handled                                             |                                                                           |
| Was the sample size included in the analysis adequate?                                                                 | Adequate sample size ( $\geq 100$ per analysis)                                 | Good sample size (50-99 per analysis)                                                   | Moderate sample size (30-49 per analysis)                                            | Small sample size ( $< 30$ per analysis)                                  |
| Were hypotheses regarding correlations or mean differences formulated a priori (i.e. before data collection)?          | hypotheses formulated a priori                                                  | Minimal number of hypotheses formulate a priori                                         | Hypotheses vague or not formulated but possible to deduce what was expected          | Unclear what was expected                                                 |
| Was the expected <i>direction</i> of correlations or mean differences included in the hypotheses?                      | Expected direction of the correlations or differences stated-                   | Expected direction of the correlations or differences NOT stated -                      |                                                                                      |                                                                           |
| Was the expected absolute or relative <i>magnitude</i> of correlations or mean differences included in the hypotheses? | Expected magnitude of the correlations or differences stated                    | Expected magnitude of the correlations or differences NOT stated                        |                                                                                      |                                                                           |
| for convergent validity: Was an adequate description provided of the comparator instrument(s)?                         | Adequate description of the constructs measured by the comparator instrument(s) | Adequate description of most of the constructs measured by the comparator instrument(s) | Poor description of the constructs measured by the comparator instrument(s)          | NO description of the constructs measured by the comparator instrument(s) |
| for convergent validity: Were the measurement properties of the comparator                                             | Adequate measurement properties of the comparator instrument(s) in a            | Adequate measurement properties of the comparator instrument(s)                         | Some information on measurement properties (or a reference to a study on measurement | No information on the measurement properties of the comparator            |

|                                                                               |                                                                                 |                                                                                                                                               |                                                                                                                                                                        |                                                                                |
|-------------------------------------------------------------------------------|---------------------------------------------------------------------------------|-----------------------------------------------------------------------------------------------------------------------------------------------|------------------------------------------------------------------------------------------------------------------------------------------------------------------------|--------------------------------------------------------------------------------|
| instrument(s) adequately described?                                           | population similar to the study population-                                     | but not sure if these apply to the study population                                                                                           | properties) of the comparator instrument(s) in any study population                                                                                                    | instrument(s)                                                                  |
| Were there any important flaws in the design or methods of the study?         | No other important methodological flaws in the design or execution of the study |                                                                                                                                               | Other minor methodological flaws in the design or execution of the study (e.g. only data presented on a comparison with an instrument that measures another construct) | Other important methodological flaws in the design or execution of the study – |
| Were design and statistical methods adequate for the hypotheses to be tested? | Statistical methods applied appropriate                                         | Assumable that statistical methods were appropriate, e.g. Pearson correlations applied, but distribution of scores or mean (SD) not presented | Statistical methods applied NOT optimal- correlation coefficients would be more appropriate                                                                            | Statistical methods applied NOT appropriate                                    |

Augustsson/ Knee Surg Sports Traumatol Arthrosc/2004

**STEP1: Evaluated measurement properties in the article**

| Check if present | Property                                | Location |
|------------------|-----------------------------------------|----------|
|                  | Reliability                             | Box A    |
|                  | Agreement/Measurement Error             | Box B    |
| ✓                | Hypothesis Testing / Construct validity | Box C    |
|                  | Criterion /Predictive Validity          | Box D    |
|                  | Responsiveness                          | Box E    |

**Step 2. Determining if a study meets the standards for good methodological quality**

**C. Hypothesis Testing / Construct Validity n= 19**

| Design requirements                                        | Excellent                                                       | Good                                                               | Fair                                     | Poor |
|------------------------------------------------------------|-----------------------------------------------------------------|--------------------------------------------------------------------|------------------------------------------|------|
| Was the percentage of missing items given?                 | Percentage of missing items described                           | Percentage of missing items NOT described                          | NA                                       | NA   |
| Was there a description of how missing items were handled? | Described how missing items were handled- all in final analysis | Not described but it can be deduced how missing items were handled | Not clear how missing items were handled |      |

|                                                                                                                        |                                                                                                                  |                                                                                                                     |                                                                                                                                                                        |                                                                                |
|------------------------------------------------------------------------------------------------------------------------|------------------------------------------------------------------------------------------------------------------|---------------------------------------------------------------------------------------------------------------------|------------------------------------------------------------------------------------------------------------------------------------------------------------------------|--------------------------------------------------------------------------------|
| Was the sample size included in the analysis adequate?                                                                 | Adequate sample size ( $\geq 100$ per analysis)                                                                  | Good sample size (50-99 per analysis)                                                                               | Moderate sample size (30-49 per analysis)                                                                                                                              | Small sample size ( $< 30$ per analysis)                                       |
| Were hypotheses regarding correlations or mean differences formulated a priori (i.e. before data collection)?          | hypotheses formulated a priori                                                                                   | Minimal number of hypotheses formulate a priori                                                                     | Hypotheses vague or not formulated but possible to deduce what was expected                                                                                            | Unclear what was expected                                                      |
| Was the expected <i>direction</i> of correlations or mean differences included in the hypotheses?                      | Expected direction of the correlations or differences stated-                                                    | Expected direction of the correlations or differences NOT stated -                                                  |                                                                                                                                                                        |                                                                                |
| Was the expected absolute or relative <i>magnitude</i> of correlations or mean differences included in the hypotheses? | Expected magnitude of the correlations or differences stated                                                     | Expected magnitude of the correlations or differences NOT stated                                                    |                                                                                                                                                                        |                                                                                |
| for convergent validity: Was an adequate description provided of the comparator instrument(s)?                         | Adequate description of the constructs measured by the comparator instrument(s)                                  | Adequate description of most of the constructs measured by the comparator instrument(s)                             | Poor description of the constructs measured by the comparator instrument(s)                                                                                            | NO description of the constructs measured by the comparator instrument(s)      |
| for convergent validity: Were the measurement properties of the comparator instrument(s) adequately described?         | Adequate measurement properties of the comparator instrument(s) in a population similar to the study population- | Adequate measurement properties of the comparator instrument(s) but not sure if these apply to the study population | Some information on measurement properties (or a reference to a study on measurement properties) of the comparator instrument(s) in any study population               | No information on the measurement properties of the comparator instrument(s)   |
| Were there any important flaws in the design or methods of the study?                                                  | No other important methodological flaws in the design or execution of the study                                  |                                                                                                                     | Other minor methodological flaws in the design or execution of the study (e.g. only data presented on a comparison with an instrument that measures another construct) | Other important methodological flaws in the design or execution of the study - |
| Were design and                                                                                                        | Statistical                                                                                                      | Assumable that                                                                                                      | Statistical methods                                                                                                                                                    | Statistical                                                                    |

|                                                               |                             |                                                                                                                                |                                                                         |                                 |
|---------------------------------------------------------------|-----------------------------|--------------------------------------------------------------------------------------------------------------------------------|-------------------------------------------------------------------------|---------------------------------|
| statistical methods adequate for the hypotheses to be tested? | methods applied appropriate | statistical methods were appropriate, e.g. Pearson correlations applied, but distribution of scores or mean (SD) not presented | applied NOT optimal- correlation coefficients would be more appropriate | methods applied NOT appropriate |
|---------------------------------------------------------------|-----------------------------|--------------------------------------------------------------------------------------------------------------------------------|-------------------------------------------------------------------------|---------------------------------|

Jerre/ Scan J Med Sci Sports /2001

**STEP1: Evaluated measurement properties in the article**

| Check if present | Property                                | Location |
|------------------|-----------------------------------------|----------|
|                  | Reliability                             | Box A    |
|                  | Agreement/Measurement Error             | Box B    |
| ✓                | Hypothesis Testing / Construct validity | Box C    |
|                  | Criterion/Predictive Validity           | Box D    |
|                  | Responsiveness                          | Box E    |

**Step 2. Determining if a study meets the standards for good methodological quality**

**C. Hypothesis Testing / Construct Validity n= 275**

| Design requirements                                                                                           | Excellent                                                        | Good                                                                      | Fair                                                                        | Poor                                 |
|---------------------------------------------------------------------------------------------------------------|------------------------------------------------------------------|---------------------------------------------------------------------------|-----------------------------------------------------------------------------|--------------------------------------|
| Was the percentage of missing items given?<br><b>none</b>                                                     | Percentage of missing items described                            | <b>Percentage of missing items NOT described</b>                          | NA                                                                          | NA                                   |
| Was there a description of how missing items were handled?                                                    | Described how missing items were handled- all in final analysis  | <b>Not described but it can be deduced how missing items were handled</b> | Not clear how missing items were handled                                    |                                      |
| Was the sample size included in the analysis adequate?                                                        | <b>Adequate sample size (<math>\geq 100</math> per analysis)</b> | Good sample size (50-99 per analysis)                                     | Moderate sample size (30-49 per analysis)                                   | Small sample size (<30 per analysis) |
| Were hypotheses regarding correlations or mean differences formulated a priori (i.e. before data collection)? | <b>hypotheses formulated a priori</b>                            | Minimal number of hypotheses formulate a priori                           | Hypotheses vague or not formulated but possible to deduce what was expected | Unclear what was expected            |
| Was the expected <i>direction</i> of correlations or mean differences                                         | <b>Expected direction of the correlations or differences</b>     | Expected direction of the correlations or differences NOT                 |                                                                             |                                      |

|                                                                                                                        |                                                                                                                         |                                                                                                                                               |                                                                                                                                                                        |                                                                                |
|------------------------------------------------------------------------------------------------------------------------|-------------------------------------------------------------------------------------------------------------------------|-----------------------------------------------------------------------------------------------------------------------------------------------|------------------------------------------------------------------------------------------------------------------------------------------------------------------------|--------------------------------------------------------------------------------|
| included in the hypotheses?                                                                                            | stated-                                                                                                                 | stated –                                                                                                                                      |                                                                                                                                                                        |                                                                                |
| Was the expected absolute or relative <i>magnitude</i> of correlations or mean differences included in the hypotheses? | Expected <b>magnitude of the correlations or differences stated</b>                                                     | Expected magnitude of the correlations or differences NOT stated                                                                              |                                                                                                                                                                        |                                                                                |
| for convergent validity: Was an adequate description provided of the comparator instrument(s)?                         | Adequate <b>description of the constructs measured by the comparator instrument(s)</b>                                  | Adequate description of most of the constructs measured by the comparator instrument(s)                                                       | Poor description of the constructs measured by the comparator instrument(s)                                                                                            | NO description of the constructs measured by the comparator instrument(s)      |
| for convergent validity: Were the measurement properties of the comparator instrument(s) adequately described?         | Adequate <b>measurement properties of the comparator instrument(s) in a population similar to the study population-</b> | Adequate measurement properties of the comparator instrument(s) but not sure if these apply to the study population                           | Some information on measurement properties (or a reference to a study on measurement properties) of the comparator instrument(s) in any study population               | No information on the measurement properties of the comparator instrument(s)   |
| Were there any important flaws in the design or methods of the study?                                                  | <b>No other important methodological flaws in the design or execution of the study</b>                                  |                                                                                                                                               | Other minor methodological flaws in the design or execution of the study (e.g. only data presented on a comparison with an instrument that measures another construct) | Other important methodological flaws in the design or execution of the study – |
| Were design and statistical methods adequate for the hypotheses to be tested?                                          | <b>Statistical methods applied appropriate</b>                                                                          | Assumable that statistical methods were appropriate, e.g. Pearson correlations applied, but distribution of scores or mean (SD) not presented | Statistical methods applied NOT optimal- correlation coefficients would be more appropriate                                                                            | Statistical methods applied NOT appropriate                                    |

Vandermeulen/Physother Can/1995

**STEP1: Evaluated measurement properties in the article**

| Check if present | Property    | Location |
|------------------|-------------|----------|
| ✓                | Reliability | Box A    |



|   |                                                |              |
|---|------------------------------------------------|--------------|
|   | Agreement/Measurement Error                    | Box B        |
| ✓ | <b>Hypothesis Testing / Construct validity</b> | <b>Box C</b> |
|   | Criterion/Predictive Validity                  | Box D        |
|   | Responsiveness                                 | Box E        |

## Step 2. Determining if a study meets the standards for good methodological quality

### A. Reliability n=46

| Design requirements                                                                                            | Excellent                                                                       | Good                                                                  | Fair                                                                     | Poor                                                                         |
|----------------------------------------------------------------------------------------------------------------|---------------------------------------------------------------------------------|-----------------------------------------------------------------------|--------------------------------------------------------------------------|------------------------------------------------------------------------------|
| Was the percentage of missing subjects given?<br>none                                                          | Percentage of missing subjects described                                        | Percentage of missing subjects NOT described                          |                                                                          |                                                                              |
| Was there a description of how missing subjects were handled?<br>none                                          | Described how missing subjects were handled                                     | Not described but it can be deduced how missing subjects were handled | Not clear how missing subjects were handled                              |                                                                              |
| Was the sample size included in the analysis adequate?                                                         | Adequate sample size ( $\geq 100$ )                                             | Good sample size (50-99)                                              | Moderate sample size (30-49)                                             | Small sample size (<30)                                                      |
| Were at least two measurements available?<br>Intra and inter intra only                                        | At least two measurements                                                       |                                                                       |                                                                          | Only one measurement                                                         |
| Were the administrations independent? Intra                                                                    | Independent measurements                                                        | Assumable that the measurements were independent                      | Doubtful whether the measurements were independent                       | Measurements NOT independent                                                 |
| Was the time interval stated?<br>Intra                                                                         | Time interval stated                                                            |                                                                       | Time interval NOT stated                                                 |                                                                              |
| Were patients stable in the interim period on the construct to be measured?<br>Intra                           | Patients were stable (evidence provided)                                        | Assumable that patients were stable                                   | Unclear if patients were stable                                          | Patients were NOT stable                                                     |
| Was the time interval appropriate?<br>Intra                                                                    | Time interval appropriate                                                       |                                                                       | Doubtful whether time interval was appropriate                           | Time interval NOT appropriate                                                |
| Were the test conditions similar for both measurements? e.g. type of administration, environment, instructions | Test conditions were similar (evidence provided)                                | Assumable that test conditions were similar                           | Unclear if test conditions were similar                                  | Test conditions were NOT similar                                             |
| Were there any important flaws in the design or methods of the study?<br>Intra                                 | No other important methodological flaws in the design or execution of the study |                                                                       | Other minor methodological flaws in the design or execution of the study | Other important methodological flaws in the design or execution of the study |
| for continuous scores: Was an                                                                                  | ICC calculated                                                                  | ICC calculated                                                        | Pearson or                                                               | No ICC or                                                                    |

|                                                                                |                                              |                                                                                                                                                                                    |                                                                                                                                                                   |                                                                |
|--------------------------------------------------------------------------------|----------------------------------------------|------------------------------------------------------------------------------------------------------------------------------------------------------------------------------------|-------------------------------------------------------------------------------------------------------------------------------------------------------------------|----------------------------------------------------------------|
| intraclass correlation coefficient (ICC) calculated?                           | and model or formula of the ICC is described | but model or formula of the ICC not described or not optimal. Pearson or Spearman correlation coefficient calculated with evidence provided that no systematic change has occurred | Spearman correlation coefficient calculated WITHOUT evidence provided that no systematic change has occurred or WITH evidence that systematic change has occurred | Pearson or Spearman correlations calculated                    |
| For dichotomous/nominal/ordinal scores: Was kappa calculated?                  | Kappa calculated                             |                                                                                                                                                                                    |                                                                                                                                                                   | Only percentage agreement calculated                           |
| for ordinal scores: Was a weighted kappa calculated?                           | Weighted Kappa calculated                    |                                                                                                                                                                                    | Unweighted Kappa calculated                                                                                                                                       | Only percentage agreement calculated – actually TEM calculated |
| for ordinal scores: Was the weighting scheme described? e.g. linear, quadratic | Weighting scheme described                   | Weighting scheme NOT described                                                                                                                                                     | With TEM – not sure how to answer this                                                                                                                            |                                                                |

### C. Hypothesis Testing / Construct Validity n= 46

| Design requirements                                                            | Excellent                                                       | Good                                                               | Fair                                                                        | Poor                                     |
|--------------------------------------------------------------------------------|-----------------------------------------------------------------|--------------------------------------------------------------------|-----------------------------------------------------------------------------|------------------------------------------|
| Was the percentage of missing items given?<br>none                             | Percentage of missing items described                           | Percentage of missing items NOT described                          | NA                                                                          | NA                                       |
| Was there a description of how missing items were handled?                     | Described how missing items were handled- all in final analysis | Not described but it can be deduced how missing items were handled | Not clear how missing items were handled                                    |                                          |
| Was the sample size included in the analysis adequate?                         | Adequate sample size ( $\geq 100$ per analysis)                 | Good sample size (50-99 per analysis)                              | Moderate sample size (30-49 per analysis)                                   | Small sample size ( $< 30$ per analysis) |
| Were hypotheses regarding correlations or mean differences formulated a priori | hypotheses formulated a priori                                  | Minimal number of hypotheses formulate a priori                    | Hypotheses vague or not formulated but possible to deduce what was expected | Unclear what was expected                |

|                                                                                                                        |                                                                                                                         |                                                                                                                                               |                                                                                                                                                                        |                                                                                |
|------------------------------------------------------------------------------------------------------------------------|-------------------------------------------------------------------------------------------------------------------------|-----------------------------------------------------------------------------------------------------------------------------------------------|------------------------------------------------------------------------------------------------------------------------------------------------------------------------|--------------------------------------------------------------------------------|
| priori (i.e. before data collection)?                                                                                  |                                                                                                                         |                                                                                                                                               |                                                                                                                                                                        |                                                                                |
| Was the expected <i>direction</i> of correlations or mean differences included in the hypotheses?                      | Expected direction of the correlations or differences stated-                                                           | Expected <b>direction of the correlations or differences NOT stated -</b>                                                                     |                                                                                                                                                                        |                                                                                |
| Was the expected absolute or relative <i>magnitude</i> of correlations or mean differences included in the hypotheses? | Expected magnitude of the correlations or differences stated                                                            | Expected magnitude of the correlations or differences NOT stated                                                                              |                                                                                                                                                                        |                                                                                |
| for convergent validity: Was an adequate description provided of the comparator instrument(s)?                         | <b>Adequate description of the constructs measured by the comparator instrument(s)</b>                                  | Adequate description of most of the constructs measured by the comparator instrument(s)                                                       | Poor description of the constructs measured by the comparator instrument(s)                                                                                            | NO description of the constructs measured by the comparator instrument(s)      |
| for convergent validity: Were the measurement properties of the comparator instrument(s) adequately described?         | <b>Adequate measurement properties of the comparator instrument(s) in a population similar to the study population-</b> | Adequate measurement properties of the comparator instrument(s) but not sure if these apply to the study population                           | Some information on measurement properties (or a reference to a study on measurement properties) of the comparator instrument(s) in any study population               | No information on the measurement properties of the comparator instrument(s)   |
| Were there any important flaws in the design or methods of the study?                                                  | <b>No other important methodological flaws in the design or execution of the study</b>                                  |                                                                                                                                               | Other minor methodological flaws in the design or execution of the study (e.g. only data presented on a comparison with an instrument that measures another construct) | Other important methodological flaws in the design or execution of the study - |
| Were design and statistical methods adequate for the hypotheses to be tested?                                          | <b>Statistical methods applied appropriate</b>                                                                          | Assumable that statistical methods were appropriate, e.g. Pearson correlations applied, but distribution of scores or mean (SD) not presented | Statistical methods applied NOT optimal- correlation coefficients would be more appropriate                                                                            | Statistical methods applied NOT appropriate                                    |
