# Supplementary material for: Clinician-friendly lower extremity physical performance measures in athletes: a systematic review of measurement properties and correlation with injury, part 1. The tests for knee function including the hop tests
Source: HighWire-hosted journal article supplement (doi:10.1136/bjsports-2014-094094), 2014-12-10
Supplement: bjsports-2014-094094supp_table2.pdf [file bjsports-2014-094094supp_table2.pdf]

**Supplementary Table 2. Tests and Their Procedures**

***ONE LEG HOP FOR DISTANCE-** The hop test is a measured maximal leap test where the subject starts on 1 leg, jumps as far forward as possible and lands on the same leg. Arm swing is allowed. The comparison between legs is often performed by dividing the lesser value by the greater value and multiplying by 100 to produce a symmetry index (DANIEL 1982 IS ORIGINAL ARTICLE)*

| <b>STUDY &amp; YEAR</b> | <b>TEST NAME</b>            | <b>ALTERNATE TEST DESCRIPTION</b>                                                                                         | <b>WARM-UP</b>                                                                                               | <b>FINAL SCORING MECHANISM</b>                                                                                                                  |
|-------------------------|-----------------------------|---------------------------------------------------------------------------------------------------------------------------|--------------------------------------------------------------------------------------------------------------|-------------------------------------------------------------------------------------------------------------------------------------------------|
| Augustsson 2004         | Single leg hop              | Hands on hips throughout the test                                                                                         | Stationary bike for 10 minutes, 15 squats, and 20 toe raises followed by 2 practice trials                   | Mean of 3 successful trials                                                                                                                     |
|                         | Fatigued single leg hop     | Knee extension to fatigue at 50% of a 1 repetition max (RM) then testing with hands on hips throughout the test           | Stationary bike for 10 minutes, 15 squats, and 20 toe raises followed by 2 submaximal sets of knee extension | Mean of 3 successful trials                                                                                                                     |
| Barber 1990             | One-legged hop for distance | In accordance with the usual                                                                                              | None identified                                                                                              | Mean of 2 attempts                                                                                                                              |
| Battaglia 2007          | Single leg hop              | No description provided                                                                                                   | None identified                                                                                              | Mean of 3 attempts                                                                                                                              |
| Bjorkland 2006 and 2009 | One leg hop for distance    | The patient jumps one-leg hop for distance, 10 hops in rapid succession as far as possible, starting with the healthy leg | Stationary bike for 10 minutes                                                                               | The patient and physiotherapist each rate performance. 1-2 points the patient performs a few short hops then stops 3-4 points involved leg hops |

|               |                         |                                     |                                      |                                                                                                                                                                                                                                                        |
|---------------|-------------------------|-------------------------------------|--------------------------------------|--------------------------------------------------------------------------------------------------------------------------------------------------------------------------------------------------------------------------------------------------------|
|               |                         |                                     |                                      | 25% of the uninvolved leg<br>5-6 points<br>involved leg hops<br>50% of the uninvolved leg<br>7-8 points<br>involved leg hops<br>75% of the uninvolved leg<br>9-10 points<br>hopping is the same distance bilaterally with equal springiness and rhythm |
| Brosky 1999   | Single hop              | Must hold the landing for 2 seconds | 1 sub-maximal trial                  | Mean of 3 trials                                                                                                                                                                                                                                       |
| Carter 1997   | Single hop              | In accordance with the usual        | None permitted                       | Best of 3 attempts                                                                                                                                                                                                                                     |
| Crossley 2007 | Hop for distance        | In accordance with the usual        | Unspecified sub-maximal warm-up      | Best of 3 attempts                                                                                                                                                                                                                                     |
| Eastlack 1999 | Single hop              | Not described                       | Followed isokinetic strength testing | Injured limb/non-injured limb x 100                                                                                                                                                                                                                    |
|               | Triple hop              | Not described                       | Followed isokinetic strength testing | Injured limb/non-injured limb x 100                                                                                                                                                                                                                    |
| Gauffin 1990  | One-leg long hop        | Arms behind the back                | None described                       | Best of 3 attempts                                                                                                                                                                                                                                     |
| Grindem 2011  | Single hop for distance | In accordance with the usual        | 1 practice trial                     | Mean of 2 attempts                                                                                                                                                                                                                                     |
|               | Triple hop for distance | 3 hops on same leg                  | 1 practice trial                     | Mean of 2 attempts                                                                                                                                                                                                                                     |

|                 |                             |                                                                                                                       |                                                                       |                                  |
|-----------------|-----------------------------|-----------------------------------------------------------------------------------------------------------------------|-----------------------------------------------------------------------|----------------------------------|
| Holm 2004       | 1-leg hop                   | Not described                                                                                                         | None described                                                        | Mean of 2 attempts               |
| Hurd 2008       | Single leg hop for distance | Not described                                                                                                         | 2 practice trials                                                     | Mean of 2 attempts               |
|                 | Triple hop for distance     | Not described                                                                                                         | 2 practice trials                                                     | Mean of 2 attempts               |
| Jerre 2001      | 1-leg hop test              | Not described                                                                                                         | None described                                                        | Lesser value/greater value x 100 |
| Koutras 2009    | Single jump                 | Arms behind back                                                                                                      | None described                                                        | Best of 3 attempts               |
| Logerstedt 2012 | Single hop for distance     | Landing must be controlled and if not, the tests is to be repeated                                                    | None described                                                        | Mean of 2 attempts               |
|                 | Triple hop for distance     | 3 hops on same leg<br>Landing must be controlled and if not, the tests is to be repeated                              | None described                                                        | Mean of 2 attempts               |
| Myer 2011       | Single hop                  | Start in a crouched position on 1 leg, use of arm swing, must hold landing for 1 second                               | Practice trials until proper technique was achieved (usually 1 trial) | Best of 2 trials.                |
|                 | Triple hop                  | Start in a crouched position on 1 leg, use of arm swing, leap 3 times on the same leg, must hold landing for 1 second | Practice trials until proper technique was achieved (usually 1 trial) | Best of 2 trials                 |
| Noyes 1991      | Single hop                  | In accordance with the usual                                                                                          | None described                                                        | Mean of 2 trials                 |
|                 | Triple hop                  | 3 hops on the same leg                                                                                                | None described                                                        | Mean of 2 trials                 |
| Ostenberg 1998  | One leg hop for distance    | Hands behind back. Must control the landing                                                                           | Sub-maximal effort on a lower extremity ergometer for 5               | Best of 3 trials                 |

|                                                                                                                                                                                                                                                                                                                    |                             |                                                                                                                             |                                                                                                                  |                             |
|--------------------------------------------------------------------------------------------------------------------------------------------------------------------------------------------------------------------------------------------------------------------------------------------------------------------|-----------------------------|-----------------------------------------------------------------------------------------------------------------------------|------------------------------------------------------------------------------------------------------------------|-----------------------------|
|                                                                                                                                                                                                                                                                                                                    |                             |                                                                                                                             | minutes                                                                                                          |                             |
| Ross 2002 and 2010                                                                                                                                                                                                                                                                                                 | Single leg hop for distance | Start with toe behind the baseline and measure distance to the heel                                                         | Stationary bike for 5 minutes followed by quadriceps, hamstring, and calf muscle stretching and 1 practice trial | Mean of 3 trials            |
| Svensson 2006                                                                                                                                                                                                                                                                                                      | Single leg hop              | Not described                                                                                                               | None described                                                                                                   | Not stated                  |
| Tegner 1986                                                                                                                                                                                                                                                                                                        | One-leg hop                 | Hands behind back                                                                                                           | Stationary bike for 10 minutes                                                                                   | Best of 3 trials            |
| Vandermeulen 2001                                                                                                                                                                                                                                                                                                  | Forward hop                 | Tested barefoot with the most posterior part of the foot in front of the starting line. Must maintain balance for 5 seconds | Maximum of 3 progressively longer hops                                                                           | Mean of 3 successful trials |
| Wilk 1994                                                                                                                                                                                                                                                                                                          | Single leg hop for distance | Start with toe behind the baseline and measure distance to the heel                                                         | None described                                                                                                   | Mean of 3 trials            |
| Witvrouw 2002                                                                                                                                                                                                                                                                                                      | Triple jump                 | Hop 3 times on 1 leg and provide a pain score                                                                               | None described                                                                                                   | Not stated                  |
| Zouita 2009                                                                                                                                                                                                                                                                                                        | Single hop                  | Arm swing allowed                                                                                                           | Unspecified 5 minute warm up                                                                                     | Best of 3 trials            |
| <b>SIX METER TIMED HOP-</b> <i>The 6-meter timed hop test measures the time it takes for a subject to traverse 6 meters hopping on one leg. The comparison between legs is often performed by dividing the lesser value by the greater value and multiplying by 100 to produce a symmetry index. (BARBER 1990)</i> |                             |                                                                                                                             |                                                                                                                  |                             |
| Barber 1990                                                                                                                                                                                                                                                                                                        | One-legged timed hop        | In accordance with the usual                                                                                                | None described                                                                                                   | Mean of 2 trials            |
| Brosky 1999                                                                                                                                                                                                                                                                                                        | Single leg timed hop        | In accordance with the usual                                                                                                | 1 sub-maximal trial                                                                                              | Mean of 3 trials            |

|                                                                                                                                                                                                                                                                                                                                                                                        |                      |                                                                                                                  |                                      |                                                                                                                                                                                                            |
|----------------------------------------------------------------------------------------------------------------------------------------------------------------------------------------------------------------------------------------------------------------------------------------------------------------------------------------------------------------------------------------|----------------------|------------------------------------------------------------------------------------------------------------------|--------------------------------------|------------------------------------------------------------------------------------------------------------------------------------------------------------------------------------------------------------|
| Crossley 2007                                                                                                                                                                                                                                                                                                                                                                          | 6-meter hop          | In accordance with the usual                                                                                     | None identified                      | Best of 3 trials                                                                                                                                                                                           |
| Eastlack 1999                                                                                                                                                                                                                                                                                                                                                                          | Timed hop            | Not described                                                                                                    | Followed isokinetic strength testing | Injured limb/non-injured limb x 100                                                                                                                                                                        |
| Grindem 2011                                                                                                                                                                                                                                                                                                                                                                           | 6-meter timed hop    | In accordance with the usual                                                                                     | 1 practice trial                     | Mean of 2 attempts                                                                                                                                                                                         |
| Hurd 2008                                                                                                                                                                                                                                                                                                                                                                              | 6-meter timed hop    | Not described                                                                                                    | 2 practice trials                    | Mean of 2 trials                                                                                                                                                                                           |
| Logerstedt 2012                                                                                                                                                                                                                                                                                                                                                                        | 6-meter timed hop    | In accordance with the usual                                                                                     | None described                       | Mean of 2 attempts                                                                                                                                                                                         |
| Noyes 1991                                                                                                                                                                                                                                                                                                                                                                             | Timed hop            | In accordance with the usual                                                                                     | None described                       | Mean of 2 trials                                                                                                                                                                                           |
| Skaara 2013                                                                                                                                                                                                                                                                                                                                                                            | 6-meter timed hop    | Not described                                                                                                    | 1 practice trial                     | Mean of 2 trials                                                                                                                                                                                           |
| Wilk 1994                                                                                                                                                                                                                                                                                                                                                                              | Single leg timed hop | In accordance with the usual                                                                                     | None described                       | Mean of 3 trials                                                                                                                                                                                           |
| <b><i>CROSSOVER HOP FOR DISTANCE-</i></b> <i>The crossover hop test is a measured maximal leap test. The subject must hop back and forth across a 15 cm wide, 6 meter long tape 3 times. The comparison between legs is often performed by dividing the lesser value by the greater value and multiplying by 100 to produce a symmetry index. (NOYES 1991 IS THE ORIGINAL ARTICLE)</i> |                      |                                                                                                                  |                                      |                                                                                                                                                                                                            |
| Bjorkland 2006 and 2009                                                                                                                                                                                                                                                                                                                                                                | Crossover hop        | The patient jumps as wide and long as possible in rapid succession on a track of 8m at a width of 30cm and 60 cm | Stationary bike for 10 minutes       | The patient and physiotherapist each rate performance.<br>1-2 points the subject stops after a few attempts to hop<br>3-4 points 25% of the length of the uninjured leg or stops after 50% of the distance |

|                 |                            |                                                                                             |                                                                       |                                                                                                                                                                                                                                                                             |
|-----------------|----------------------------|---------------------------------------------------------------------------------------------|-----------------------------------------------------------------------|-----------------------------------------------------------------------------------------------------------------------------------------------------------------------------------------------------------------------------------------------------------------------------|
|                 |                            |                                                                                             |                                                                       | 5-6 points<br>50% of the length of the uninvolved leg but without rhythm and flow<br>7-8 points<br>75% of the length of the uninvolved leg but with restricted springiness and rhythm<br>9-10 points<br>100% of the distance, springiness, and rhythm of the uninvolved leg |
| Eastlack 1999   | Crossover hop              | Not described                                                                               | Followed isokinetic strength testing                                  | Injured limb/non-injured limb x 100                                                                                                                                                                                                                                         |
| Grindem 2011    | Crossover hop for distance | In accordance with the usual                                                                | 1 practice trial                                                      | Mean of 2 attempts                                                                                                                                                                                                                                                          |
| Hurd 2008       | Crossover hop for distance | In accordance with the usual                                                                | 2 practice trials                                                     | Mean of 2 trials                                                                                                                                                                                                                                                            |
| Logerstedt 2012 | Crossover hop for distance | Landing must be controlled and if not, the tests is to be repeated                          | None described                                                        | Mean of 2 attempts                                                                                                                                                                                                                                                          |
| Myer 2011       | Crossover hop for distance | Start in a crouched position on 1 leg, use of arm swing, leap 3 times on the same leg, must | Practice trials until proper technique was achieved (usually 1 trial) | Best of 2 trials                                                                                                                                                                                                                                                            |

|                                                                                                                                                                                               |                                              |                                                                                                                                                                          |                                |                                                                                                                                                                                                                                                                                 |
|-----------------------------------------------------------------------------------------------------------------------------------------------------------------------------------------------|----------------------------------------------|--------------------------------------------------------------------------------------------------------------------------------------------------------------------------|--------------------------------|---------------------------------------------------------------------------------------------------------------------------------------------------------------------------------------------------------------------------------------------------------------------------------|
|                                                                                                                                                                                               |                                              | hold landing for 1 second                                                                                                                                                |                                |                                                                                                                                                                                                                                                                                 |
| Noyes 1991                                                                                                                                                                                    | Crossover hop for distance                   | In accordance with the usual                                                                                                                                             | None described                 | Mean of 2 trials                                                                                                                                                                                                                                                                |
| Skaara 2013                                                                                                                                                                                   | Triple crossover hop                         | Not described                                                                                                                                                            | 1 practice trial               | Mean of 2 trials                                                                                                                                                                                                                                                                |
| Wilk 1994                                                                                                                                                                                     | Single leg crossover triple hop for distance | In accordance with the usual                                                                                                                                             | None described                 | Mean of 3 trials                                                                                                                                                                                                                                                                |
| <b>FIGURE OF EIGHT RUN-</b> <i>The figure of eight is a timed agility test that involves straight ahead running of curves. There is no standardization of distance or severity of curves.</i> |                                              |                                                                                                                                                                          |                                |                                                                                                                                                                                                                                                                                 |
| <b>STUDY</b>                                                                                                                                                                                  | <b>TEST NAME</b>                             | <b>TEST DESCRIPTION</b>                                                                                                                                                  | <b>WARM-UP</b>                 | <b>FINAL SCORING MECHANISM</b>                                                                                                                                                                                                                                                  |
| Bjorkland 2006 and 2009                                                                                                                                                                       | Figure of 8 jog                              | Jog straight 2 x 20 meters then in a figure of eight around 2 circles, 4 meters in diameter. After ½ the distance, speed and stride length should be increased to normal | Stationary bike for 10 minutes | The patient and physiotherapist each rate performance.<br>1-2 points the patient stops jogging<br>3-4 points jogging is asymmetrical<br>5-6 points symmetrical jogging but figure 8 is asymmetrical<br>7-8 points involved leg hops<br>75% of the uninvolved leg<br>9-10 points |

|                                                                                                                                                                                                                                                                                                                                                                       |                          |                                                                                                                                                      |                                                                 |                                                                            |
|-----------------------------------------------------------------------------------------------------------------------------------------------------------------------------------------------------------------------------------------------------------------------------------------------------------------------------------------------------------------------|--------------------------|------------------------------------------------------------------------------------------------------------------------------------------------------|-----------------------------------------------------------------|----------------------------------------------------------------------------|
|                                                                                                                                                                                                                                                                                                                                                                       |                          |                                                                                                                                                      |                                                                 | hopping is the same distance bilaterally with equal springiness and rhythm |
| Carter 1997                                                                                                                                                                                                                                                                                                                                                           | Figure of 8 run          | Each subject completes five timed circuits of a figure of eight constructed by placing cones at each corner of a rectangle 8 m by 5 m in a gymnasium | None permitted                                                  | Best of 3 trials                                                           |
| <b>TRIPLE JUMP-</b> <i>The triple jump is a maximal leap test involving both single leg hopping and double leg jumping. The subject begins in bilateral stance, jumps and lands on 1 leg, hops and lands on the same leg again, then hops and lands on 2 legs.</i>                                                                                                    |                          |                                                                                                                                                      |                                                                 |                                                                            |
| Holm 2004                                                                                                                                                                                                                                                                                                                                                             | Triple jump              | In accordance with the usual                                                                                                                         | None identified                                                 | Mean of two trials                                                         |
| Koutras 2009                                                                                                                                                                                                                                                                                                                                                          | Triple jump              | In accordance with the usual                                                                                                                         | None identified                                                 | Best of 3 trials                                                           |
| Ostenberg 1998                                                                                                                                                                                                                                                                                                                                                        | Triple jump              | If subjects increased distance in all 3 trials, additional trials were conducted until improvement stopped                                           | Sub-maximal effort on a lower extremity ergometer for 5 minutes | The best trial                                                             |
| <b>VERTICAL JUMP-</b> <i>The vertical jump is a maximum jump height test. A standing reach height is measured. Standing in place on either 1 (single leg) or 2 legs, the subject squats then leaps as high as possible as marked by a finger tip reach at the apex of the jump. The reach height is subtracted from the apex height to determine the jump height.</i> |                          |                                                                                                                                                      |                                                                 |                                                                            |
| Barber 1990                                                                                                                                                                                                                                                                                                                                                           | One-legged vertical jump | Chalk is applied to subjects' fingertips so that a mark is left on a wall. Must take off and                                                         | None identified                                                 | Mean of 2 trials                                                           |



|                         |                          |                                                                          |                                |                                                                                                                                                                                                                                                                                                                                                                              |
|-------------------------|--------------------------|--------------------------------------------------------------------------|--------------------------------|------------------------------------------------------------------------------------------------------------------------------------------------------------------------------------------------------------------------------------------------------------------------------------------------------------------------------------------------------------------------------|
|                         |                          | land on the same leg.                                                    |                                |                                                                                                                                                                                                                                                                                                                                                                              |
| Bjorkland 2006 and 2009 | Single leg vertical jump | 5 vertical hops in rapid succession as high as possible with springiness | Stationary bike for 10 minutes | The patient and physiotherapist each rate performance.<br>1-2 points the patient stops the attempt to jump<br>3-4 points short jumps without springiness<br>5-6 points 50% of the springiness and height of the uninvolved leg<br>7-8 points 75% of the springiness and height of the uninvolved leg<br>9-10 points 100% of the springiness and height of the uninvolved leg |
| Brosky 1999             | Single leg vertical jump | Used a slatted device on vertical pole with arms free                    | 1 sub-maximal trial            | Mean of 3 trials                                                                                                                                                                                                                                                                                                                                                             |
| Koutras 2009            | Modified vertical jump   | A tape measure is                                                        | None identified                | Best of 3 trials                                                                                                                                                                                                                                                                                                                                                             |

|                                                                                                                                                                                                                                                       |                  |                                                                                                                                                                                                                                      |                                                                                               |                                                                                                         |
|-------------------------------------------------------------------------------------------------------------------------------------------------------------------------------------------------------------------------------------------------------|------------------|--------------------------------------------------------------------------------------------------------------------------------------------------------------------------------------------------------------------------------------|-----------------------------------------------------------------------------------------------|---------------------------------------------------------------------------------------------------------|
|                                                                                                                                                                                                                                                       |                  | secured around the subject's belt who is then instructed to jump vertically and maximally on one leg.                                                                                                                                |                                                                                               |                                                                                                         |
| Ostenberg 1998                                                                                                                                                                                                                                        | Vertical jump    | A tape measure is secured around the subject's belt who is then instructed to jump vertically and maximally on both legs. If subjects increased distance in all 3 trials, additional trials were conducted until improvement stopped | Sub-maximal effort on a lower extremity ergometer for 5 minutes                               | Best of 3 trials                                                                                        |
| Purdam 2003                                                                                                                                                                                                                                           | Single leg hop   | Jump and land on the same leg on a 25 degree decline board                                                                                                                                                                           | 5 minute warm-up on a bike followed by stretching of quadriceps, hamstrings, and calf muscles | 2 repetitions and rate pain on a 0-10 scale                                                             |
| <b><i>SINGLE LEG SQUAT-</i></b> <i>The single leg squat is a test of motor control, balance and strength that involves standing on 1 leg and squatting to a point where the thigh is near parallel to the floor then returning to standing again.</i> |                  |                                                                                                                                                                                                                                      |                                                                                               |                                                                                                         |
| Bjorkland 2006 and 2009                                                                                                                                                                                                                               | Single leg squat | 3 maximum squats in succession                                                                                                                                                                                                       | Stationary bike for 10 minutes                                                                | The patient and physiotherapist each rate performance. 1-2 points the patient makes an attempt to squat |

|                         |                            |                                                                                                                                                                         |                                |                                                                                                                                                                                                                                                                                            |
|-------------------------|----------------------------|-------------------------------------------------------------------------------------------------------------------------------------------------------------------------|--------------------------------|--------------------------------------------------------------------------------------------------------------------------------------------------------------------------------------------------------------------------------------------------------------------------------------------|
|                         |                            |                                                                                                                                                                         |                                | <p>with the affected knee</p> <p>3-4 points<br/>can squat 25% of the unaffected knee</p> <p>5-6 points<br/>can squat 50% of the unaffected knee</p> <p>7-8 points<br/>can squat 75% of the unaffected knee</p> <p>9-10 points<br/>can squat 100% of the unaffected knee</p>                |
| Bjorkland 2006 and 2009 | Single leg rise from chair | Seated with the knee flexed to 90 degrees or the angle that the subject can rise from with the healthy knee, the patient must stand and then sit again using only 1 leg | Stationary bike for 10 minutes | <p>The patient and physiotherapist each rate performance.</p> <p>1-2 points<br/>the patient is able to move slightly</p> <p>3-4 points<br/>able to stand halfway</p> <p>5-6 points<br/>stands with great difficulty and sits without control</p> <p>7-8 points<br/>stands with certain</p> |

|                                                                                                          |                                       |                                                                                                                                                                   |                                                                                               |                                                                                                             |
|----------------------------------------------------------------------------------------------------------|---------------------------------------|-------------------------------------------------------------------------------------------------------------------------------------------------------------------|-----------------------------------------------------------------------------------------------|-------------------------------------------------------------------------------------------------------------|
|                                                                                                          |                                       |                                                                                                                                                                   |                                                                                               | arm assistance and sits with limited control<br>9-10 points stands without difficulty and sits with control |
| Purdam 2003                                                                                              | Single leg squat on the decline board | On a 25 degree decline board                                                                                                                                      | 5 minute warm-up on a bike followed by stretching of quadriceps, hamstrings, and calf muscles | 2 repetitions and rate pain on a 0-10 scale                                                                 |
| Ostenberg 1998                                                                                           | One-leg rising                        | Seated on a height-adjustable bench with one foot on a stool and the other one in the air. A successful rise from the seated position without the use of the arms | Sub-maximal effort on a lower extremity ergometer for 5 minutes                               | The best trial-distance between the bench seat and the foot stool.                                          |
| Witvrouw 2002                                                                                            | Unilateral squat test                 | A full squat is listed as asymptomatic                                                                                                                            | None identified                                                                               | The maximum angle achieved without pain                                                                     |
| <b><i>OTHER TESTS- These are unique tests examined in only 1 study or by 1 author/set of authors</i></b> |                                       |                                                                                                                                                                   |                                                                                               |                                                                                                             |
| <b>STUDY</b>                                                                                             | <b>TEST NAME</b>                      | <b>TEST DESCRIPTION</b>                                                                                                                                           | <b>WARM-UP</b>                                                                                | <b>FINAL SCORING MECHANISM</b>                                                                              |
| Barber 1990                                                                                              | Shuttle run                           | Sprint in circles around 2 cones 6 meters apart with first, one leg on the                                                                                        | One, half-speed trial with each circling leg                                                  | Mean of 2 trials                                                                                            |

|                         |                           |                                                                                                                                                                              |                                |                                                                                                                                                                                                                                                                                                                        |
|-------------------------|---------------------------|------------------------------------------------------------------------------------------------------------------------------------------------------------------------------|--------------------------------|------------------------------------------------------------------------------------------------------------------------------------------------------------------------------------------------------------------------------------------------------------------------------------------------------------------------|
|                         |                           | inside (circling limb) and then the other                                                                                                                                    |                                |                                                                                                                                                                                                                                                                                                                        |
| Barber 1990             | Cutting type shuttle run  | Over a 6 meter course, sprint from beginning to end, decelerate rapidly, change direction and sprint to the starting point. 2 laps are completed with each limb as the lead. | None identified                | Mean of 2 trials                                                                                                                                                                                                                                                                                                       |
| Bjorkland 2006 and 2009 | Acceleration/Deceleration | Sprint 2 x 20 meters with deceleration required within 5 meters                                                                                                              | Stationary bike for 10 minutes | The patient and physiotherapist each rate performance.<br>1-2 points the patient is unable to sprint<br>3-4 points can sprint but not accelerate or decelerate<br>5-6 points limping during acceleration, is unable to reach full speed, decelerate mostly with the uninjured leg<br>7-8 points can accelerate to full |

|             |                             |                                                                                                                                                                                                                                                                                                            |                                                                       |                                                                                                                                                    |
|-------------|-----------------------------|------------------------------------------------------------------------------------------------------------------------------------------------------------------------------------------------------------------------------------------------------------------------------------------------------------|-----------------------------------------------------------------------|----------------------------------------------------------------------------------------------------------------------------------------------------|
|             |                             |                                                                                                                                                                                                                                                                                                            |                                                                       | <p>speed but decelerate unevenly or exceeds the 5 meters</p> <p>9-10 points accelerates to full speed and decelerates evenly with the 5 meters</p> |
| Holm 2004   | Stair hop                   | Stand on 1 leg, hop up 22 steps, then hop down 22 steps                                                                                                                                                                                                                                                    | None stated                                                           | Time to completion in seconds                                                                                                                      |
| Myer 2011   | Broad jump                  | Start with the toes of both feet on a line and to use arm swing to leap forward as far as possible. Distance was measured from the start line to where the closest body segment touched on the test mat. Athletes were allowed 2 trials to achieve maximum broad jump distance to be recorded for analysis | Practice trials until proper technique was achieved (usually 1 trial) | Best of 2 trials                                                                                                                                   |
| Nagano 2010 | Star excursion balance test | Custom-made device with 3 measuring cords running in an anterior, posteromedial, and posterolateral direction.                                                                                                                                                                                             | 3 practice trials in each direction                                   | The greatest reach of 3 in each direction. Also, the greatest reach in each direction was                                                          |

|                   |                                 |                                                                                                                          |                                                                 |                                                                                                                                |
|-------------------|---------------------------------|--------------------------------------------------------------------------------------------------------------------------|-----------------------------------------------------------------|--------------------------------------------------------------------------------------------------------------------------------|
|                   |                                 | Distance in each direction measured by a sliding device on each cord move with the foot.                                 |                                                                 | added together for a composite score which was normalized to leg length as measured from ASIS to medial malleolus in standing. |
| Ostenberg 1998    | Square hop test                 | One leg, clockwise hopping over the sides of a 30 x 35 centimeter square                                                 | Sub-maximal effort on a lower extremity ergometer for 5 minutes | Maximum number of touches inside the square for each leg in 30 seconds                                                         |
| Tegner 1986       | Running up and down a staircase | Running up and down a 25-step spiral staircase                                                                           | Stationary bike for 10 minutes                                  | Time measured by a stopwatch                                                                                                   |
| Tegner 1986       | Running up and down a slope     | Running up a 55 meter long slope with a 180 turn halfway up, then running down the same slope                            | Stationary bike for 10 minutes                                  | Time measured by a stopwatch                                                                                                   |
| Vandermeulen 2001 | Lateral hop                     | Tested barefoot with the most medial part of the foot in front of the starting line. Must maintain balance for 5 seconds | Maximum of 3 progressively longer hops                          | Mean of 3 successful trials                                                                                                    |
| Witvrouw 2002     | Step test                       | Step up and down a 10-centimeter step. If no pain experienced, the step increases 5 centimeters until pain               | None identified                                                 | Height of step where pain occurred                                                                                             |

|  |  |        |  |  |
|--|--|--------|--|--|
|  |  | occurs |  |  |
|--|--|--------|--|--|
